# Oxamniquine resistance alleles are widespread in Old World

## *Schistosoma mansoni* and predate drug deployment

Frédéric D. Chevalier<sup>1\*</sup>, Winka Le Clec'h<sup>1</sup>, Marina McDew-White<sup>1</sup>, Vinay Menon<sup>1</sup>, Meghan A. Guzman<sup>2</sup>, Stephen P. Holloway<sup>3</sup>, Xiaohang Cao<sup>3</sup>, Alexander B. Taylor<sup>3,4</sup>, Safari Kinung'hi<sup>5</sup>, Anouk N. Gouvras<sup>6,7</sup>, Bonnie L. Webster<sup>6,7</sup>, Joanne P. Webster<sup>6,8</sup>, Aidan M. Emery<sup>6,7</sup>, David Rollinson<sup>6,7</sup>, Amadou Garba Djirmay<sup>9,10</sup>, Khalid M. Al Mashikhi<sup>11</sup>, Salem Al Yafae<sup>11</sup>, Mohamed A. Idris<sup>12</sup>, Hélène Moné<sup>13</sup>, Gabriel Mouahid<sup>13</sup>, P. John Hart<sup>3,4</sup>, Philip T. LoVerde<sup>2</sup>, Timothy JC. Anderson<sup>1\*</sup>

<sup>1</sup> Texas Biomedical Research Institute, San Antonio, Texas, USA

<sup>2</sup> Departments of Pathology and <sup>3</sup>Biochemistry & Structural Biology, University of Texas Health Science Center at San Antonio, San Antonio, Texas, USA

<sup>4</sup> X-ray Crystallography Core Laboratory, University of Texas Health Science Center at San Antonio, San Antonio, Texas, USA

<sup>5</sup> National Institute for Medical Research, Mwanza, United Republic of Tanzania

<sup>6</sup> London Centre for Neglected Tropical Disease Research (LCNDTR), Imperial Collge, London, United Kingdom

<sup>7</sup> Wolfson Wellcome Biomedical Laboratories, Natural History Museum, London, United Kingdom

<sup>8</sup> Centre for Emerging, Endemic and Exotic Diseases (CEEED), Royal Veterinary College, University of London, United Kingdom

<sup>9</sup> Réseau International Schistosomiases Environnemental Aménagement et Lutte (RISEAL), Niamey, Niger

<sup>10</sup> World Health Organization, Geneva, Switzerland

25 <sup>11</sup> Directorate General of Health Services, Dhofar Governorate, Salalah, Sultanate of Oman

26 <sup>12</sup> Sultan Qaboos University, Muscat, Sultanate of Oman

27 <sup>13</sup> Host-Pathogen-Environment Interactions laboratory, University of Perpignan, France

28

29 \*Corresponding authors: [fccheval@txbiomed.org](mailto:fccheval@txbiomed.org), [tanderso@txbiomed.org](mailto:tanderso@txbiomed.org)

30

31 Short title: Standing variation for oxamniquine resistance in schistosomes

## ABSTRACT

Do mutations required for adaptation occur *de novo*, or are they segregating within populations as standing genetic variation? This question is key to understanding adaptive change in nature, and has important practical consequences for the evolution of drug resistance. We provide evidence that alleles conferring resistance to oxamniquine (OXA), an antischistosomal drug, are widespread in natural parasite populations under minimal drug pressure and predate OXA deployment. OXA has been used since the 1970s to treat *Schistosoma mansoni* infections in the New World where *S. mansoni* established during the slave trade. Recessive loss-of-function mutations within a parasite sulfotransferase (*SmSULT-OR*) underlie resistance, and several verified resistance mutations, including a deletion (p.E142del), have been identified in the New World. Here we investigate sequence variation in *SmSULT-OR* in *S. mansoni* from the Old World, where OXA has seen minimal usage. We sequenced exomes of 204 *S. mansoni* parasites from West Africa, East Africa and the Middle East, and scored variants in *SmSULT-OR* and flanking regions. We identified 39 non-synonymous SNPs, 4 deletions, 1 duplication and 1 premature stop codon in the *SmSULT-OR* coding sequence, including one confirmed resistance deletion (p.E142del). We expressed recombinant proteins and used an *in vitro* OXA activation assay to functionally validate the OXA-resistance phenotype for four predicted OXA-resistance mutations. Three aspects of the data are of particular interest: (i) segregating OXA-resistance alleles are widespread in Old World populations (4.29 – 14.91% frequency), despite minimal OXA usage, (ii) two OXA-resistance mutations (p.W120R, p.N171IfsX28) are particularly common (>5%) in East African and Middle-Eastern populations, (iii) the p.E142del allele has identical flanking SNPs in both West Africa and Puerto Rico, suggesting that parasites bearing this allele colonized the New World during the slave trade and therefore predate OXA deployment. We conclude that standing variation for OXA resistance is widespread in *S. mansoni*.

## AUTHOR SUMMARY

It has been argued that drug resistance is unlikely to spread rapidly in helminth parasites infecting humans. This is based, at least in part, on the premise that resistance mutations are rare or absent within populations prior to treatment, and take a long time to reach appreciable frequencies because helminth parasite generation time is long. This argument is critically dependent on the starting frequency of resistance alleles – if high levels of “standing variation” for resistance are present prior to deployment of treatment, resistance may spread rapidly. We examined frequencies of oxamniquine resistance alleles present in *Schistosoma mansoni* from Africa and the Middle East where oxamniquine has seen minimal use. We found that oxamniquine resistance alleles are widespread in the Old World, ranging from 4.29% in the Middle East to 14.91% in East African parasite populations. Furthermore, we show that resistance alleles from West African and the Caribbean schistosomes share a common origin, suggesting that these alleles travelled to the New World with *S. mansoni* during the transatlantic slave trade. Together, these results demonstrate extensive standing variation for oxamniquine resistance. Our results have important implications for both drug treatment policies and drug development efforts, and demonstrate the power of molecular surveillance approaches for guiding helminth control.

## INTRODUCTION

The rate at which drug resistance alleles (or any other beneficial alleles) spread within populations in response to a drug treatment (or any other selection pressure) is critically dependent on the starting frequency of resistance alleles in the population when new drugs are deployed (1,2). If no such alleles are present when a novel drug is introduced, then there is a waiting time for resistance alleles to arise. Furthermore, because the starting allele frequency will be  $1/(2N_e)$ , where  $N_e$  is the effective population size, the vast majority of resistance alleles that arise will be lost due to genetic drift and fail to establish (2,3) (Fig. 1). The barrier to establishment is particularly severe for recessive traits because these will be present in heterozygotes at low frequency and therefore not exposed to selection. This effect, otherwise known as “Haldanes’s sieve” (4), may be particularly relevant for drug resistance evolution in diploid pathogens, because resistance mutations in drug targets typically result in phenotypic resistance only when two copies are present. However, if resistance alleles are already segregating as standing variation in pathogen populations when drug treatment is initiated, then there is no waiting time for mutations to arise. Furthermore, there is a high probability of fixation and spread is rapid because many resistance alleles are present in homozygous recessive genotypes and therefore exposed to selection. Hence, whether resistance alleles (or alleles for other traits) arise *de novo* or are segregating as standing variation, is a central question in evolutionary biology and public health, and key to predicting the effective “shelf life” of new drug treatments (3,5).

There is growing evidence for resistance to anti-helminthics in several helminths infecting humans, including *Onchocerca volvulus* (6), the filarial nematode causing river blindness, and in soil transmitted helminths (hookworm, whipworm and *Ascaris* roundworms) (7) which cumulatively infect over one billion people worldwide (8). However, perhaps the best understood is oxamniquine resistance in schistosome blood flukes, for which the mechanism of drug action and the genetic and molecular basis for drug resistance are now known. Oxamniquine (OXA) kills *Schistosoma mansoni*, but is ineffective against two other major schistosome species infecting humans (*S. haematobium* and *S. japonicum*) (9). OXA is a pro-drug that is activated by a schistosome sulfotransferase (SmSULT-OR) encoded on chromosome

6 (10). Loss-of-function mutations within SmSULT-OR result in resistance: only parasites that are homozygous for resistance alleles are phenotypically resistant (OXA-R). We initially identified the locus and mutation, a single amino acid deletion (p.E142del), underlying OXA-R using a genetic cross involving a resistant parasite line selected from a parasite isolate from a Puerto Rican patient in 1971 (11). Additionally we identified a second mutation (p.C35R) in *S. mansoni* obtained from an incurable Brazilian patient (12). These two mutations result in disruption of the active site of the SmSULT-OR and inability to activate OXA (10). Both p.E142del and p.C35R, and two additional mutations resulting in truncated proteins, were subsequently identified in a field survey of SmSULT-OR genetic variation of parasites from a single Brazilian village (13). The combined allele frequency of these four resistant alleles was 1.85%.

OXA was widely used in the New World, where only *S. mansoni* is present, during the 1970s to early 2000's (14), so the OXA-R alleles we observed in Brazil (13) could conceivably have resulted from drug selection. In contrast, OXA saw minimal usage in Africa where both *S. haematobium* and *S. mansoni* are present. In South America, an estimated 6 million doses of OXA were used to treat the 7 million people infected with *S. mansoni* prior to 1987 (15). In contrast, 3 million doses had been used in Africa (Egypt, Ethiopia, Ivory Coast, Kenya, Malagasy, Malawi, Rwanda-Burundi, South Africa, Sudan, Tanzania, Uganda, Zambia, Zaire) and the Middle East (Arabian peninsula) (15), where an estimated ~60 million people were infected with *S. mansoni* (16). Hence, OXA selection was minimal in Africa compared with South America. The central aim of this paper is to determine whether *de novo* mutation or standing variation best explains OXA-R in *S. mansoni* populations. To do this we examined SmSULT-OR genetic variation in Old World parasite populations where OXA treatment has been minimal.

# RESULTS

## 1. Samples

We sequenced exomes from 92 miracidia from Tanzania (n=57), Niger (n=10), and Senegal (n=25) from the SCAN collection at the Natural History Museum (17), with each miracidium derived from a different patient. In addition, we included 112 samples collected from Oman: these included 86 single worms and 26 pools of cercariae from single infected snails. The Omani samples were derived from 11 human infections, 2 naturally infected rodents, and 26 naturally infected snails. We compared these Old World parasite samples with: (i) the OXA-R parasite from Puerto Rico (HR) carrying the causative p.E142del mutation identified previously (10), for which whole genome sequence is available, and (ii) published *SmSULT-OR* sequences from a single Brazilian location (n=189) (13).

## 2. New and known mutations identified in the *SmSULT-OR* gene

We identified a total of 85 *SmSULT-OR* mutations across all three populations (West Africa, East Africa and Middle East), including 76 coding mutations and 9 non-coding mutations (Supp. table 1). Exon 1 carried 24 mutations. These included 13 non-synonymous single nucleotide polymorphisms (SNPs), 8 synonymous SNPs, one duplication, one deletion, and one premature stop codon. Exon 2 carried 52 mutations: 26 non-synonymous SNPs, 23 synonymous and three deletions. There were no differences in the density of mutations in the two exons (Fisher's exact test, d.f.=1, p=0.09). The overall transition/transversion ratio was 1.94. Forty-three percent (37/85 mutations) showed an average allele frequency greater than 5%.

Among the 85 mutations, we have previously found three coding and one non-coding mutations in the New World (Caribbean and Brazil): the substitution p.P67L (g.200C>T), the deletion p.E142del (g.4348\_4350delGAA), the substitution p.L256W (g.4691T>G) and the 3' untranslated region (UTR) substitution g.4720C>T (10,13). Just one of these mutations (p.E142del) encodes a confirmed OXA-R allele. Frequencies of all mutations in each population are shown in the supp. table 1.

We measured nucleotide diversity ( $\pi$ ) in both New and Old World populations. Nucleotide diversity was the highest in Oman ( $\pi = 0.02424 \pm 2.4 \times 10^{-4}$ ) followed by East Africa ( $\pi = 0.00195 \pm 2 \times 10^{-4}$ ), West Africa ( $\pi = 0.00126 \pm 1.7 \times 10^{-4}$ ) and Brazil ( $\pi = 0.00021 \pm 0.3 \times 10^{-4}$ ). If drug pressure drives the changes at *SmSULT-OR*, we might expect to see signals of positive selection. We examined sequence conservation by measuring proportions of non-synonymous difference per non-synonymous site relative to synonymous changes per synonymous site ( $K_a/K_s$ ) between *S. mansoni* and a *S. rodhaini* outgroup.  $K_a/K_s$  ranged from 0.20 – 0.24 suggesting that changes at non-synonymous sites are 4-5 times less abundant than at synonymous sites, consistent with weak purifying selection. Similarly, the ratio of non-synonymous polymorphisms per non-synonymous site relative to synonymous polymorphisms per synonymous site (pN/pS) ranged from 0.111 to 1.36 and none of these values were significantly greater than unity (Table 1). These tests did not provide evidence that *SmSULT-OR* is under positive selection.

### 3. *In vitro* tests and *in silico* evaluation of impact of mutations

We used three approaches to identify *SmSULT-OR* mutations that are likely to result in OXA-R.

#### a. Visual assessment

Some mutations have obvious deleterious effect on the protein by introducing premature stop codons. This is the case for three mutations identified in *SmSULT-OR*. These mutations will generate truncated proteins that do not contain the active site. Other mutations, such as p.L179P, p.P225S or p.W120R, were either close enough to the OXA or the 3'-phosphoadenosine-5'-phosphosulfate (PAPS) binding sites or showed potential steric hindrance or structural deformation likely to have an effect on protein activity. Other mutations, such as p.A74T, p.P106S or p.Q176R, were on the surface of the protein, distant to any active site, and therefore unlikely to have an impact.

#### b. Functional assay of OXA binding

We used an *in vitro* OXA activation assay to functionally assay the impact of mutations on *SmSULT-OR* activity for four newly discovered mutations and the two known OXA-R mutations



(Fig. 3). The known resistant mutations, p.C35R and p.E142del, showed from zero to very low level of OXA activation, as expected (10). p.L179P showed a similarly low level of activation. The mutations p.S160L and p.P225S showed intermediate OXA activation: we conservatively classed these as OXA sensitive alleles. p.P106S showed similar activity to the wild type and p.S160L. We were able to produce recombinant protein p.W120R but all our attempts to fold this protein were unsuccessful. This mutation clearly has a dramatic impact on protein stability as predicted by visual inspection and thermodynamic modelling results (below). We considered this mutation to be OXA-R.

### c. Thermodynamic modelling

We used thermodynamic modelling to evaluate the potential impact of substitutions on protein stability (indels such as p.E142del cannot be modelled). The difference in free enthalpy ( $\Delta\Delta G$ ) ranged from -2.942 to 19.826 for the 37 mutations (Fig. 4). Among those, p.L179P and p.C35R which have the greatest impact on OXA activation (Fig. 3) showed the second and third highest  $\Delta\Delta G$ , respectively. p.W120R, for which we were unable to fold recombinant protein, showed the highest  $\Delta\Delta G$ , consistent with a dramatic impact on stability. p.S160L and p.P225S showed intermediate  $\Delta\Delta G$  consistent with the results of the OXA activation assay.

In total, we identified 7 independent OXA-R mutations in Old and New World parasite populations examined using these three approaches (Table 2, Fig. 2). These included 3 indels and 4 amino acid mutations.

## 4. Frequency of OXA-R alleles

Having determined which of the mutations identified are likely to cause OXA-R, we measured the frequency of resistant variants and the frequency of resistant parasites in each population (Table 2, Fig. 5). To accurately identify resistant alleles and parasites, we phased our variant calling data on the first 3 Mb of the chromosome 6 (corresponding to 30,812 variable sites). West African samples carried only two resistant variants (p.S12X and p.E142del). East African samples carried five resistant variants, two of them at a frequency over 0.05 (p.W120R and

p.N171IfsX28). The p.W120R mutation was also found at high frequency in Middle East (0.065). We found the highest frequency of OXA-R alleles in East Africa (14.91%, 17/114), followed by the Middle East (6.25%, 14/224), West Africa (4.29%, 3/70), and Brazil (1.85%, 7/378).

Most parasites carried OXA-R alleles in the heterozygous state and are predicted to be OXA sensitive. Heterozygous OXA-sensitive parasites were found in West and East Africa (8.6% and 24.6%, respectively), Middle East (13.4%) and in Brazil (1.06%). Parasites that are homozygous for OXA-R alleles at *SmSULT-OR* (but not necessarily carrying the same resistant variant) are OXA-R. We found homozygous parasites predicted to be phenotypically OXA-R at a frequency of 5.26% (3/57) in East Africa and 1.06% (2/189) in South America only (Fig. 5).

## 5. Haplotype analysis of *SmSULT-OR* and flanking regions

We used our phased data to investigate the haplotypes surrounding our resistant variant (p.E142del) in the Old and New World (Caribbean) (Table 1) and to investigate whether these resistant alleles derived from a common ancestor. This is of interest because it would suggest that these alleles predate the slave trade. We identified an identical 102.5 kb haplotype block around p.E142del shared between the Caribbean sample and one of the West African samples from Niger (Fig. 6A). This haplotype block contained 399 SNPs that varied in at least one of the 205 parasites examined (all samples except those from Brazil where haplotype data were not available). We used a minimum spanning network to investigate haplotype relationships using the 399 bi-allelic variants found in this 102.5 kb block across all phased haplotypes (Fig. 6B). The haplotypes associated with the p.E142del OXA-R alleles found in both Puerto Rico and Niger clustered together, consistent with a common origin for West African and Caribbean p.E142del OXA-R mutations.

The p.E142del mutation was also identified in Brazil (13) but we sequenced the *SmSULT-OR* exons only, rather than complete exomes, for these Brazilian samples preventing reconstruction of extended haplotypes. This Brazilian p.E142del was also found associated with two mutations (p.P67L and g.4720C>T) found in West Africa but without the p.L256W found in the Caribbean and Nigerien samples. Similarly, the p.E142del was also found in a Tanzanian

235 sample but this sample has a distinct haplotype from those found in West Africa (Fig. 6). These  
236 results suggest either that there are several independent origins of East and West African  
237 p.E142del mutations, or alternatively, that the p.E142del is extremely old and has distinctive  
238 flanking haplotypes resulting from recombination and mutation.

## DISCUSSION

### 1. Evidence for standing genetic variation for OXA resistance

Two lines of evidence support the view that standing variation is the source of OXA-R alleles in schistosomes. First, we have indirect evidence: OXA-R alleles are geographically widespread in Africa and the Middle East despite limited treatment with OXA (or hycanthone, its structural analog; (18)) in these regions. Furthermore, that OXA-R alleles are found at high frequency in East Africa, where there has been minimal use of OXA, while OXA-R alleles are found at low frequency in Brazil, where OXA has been used extensively, is also consistent with the idea that mutation and drift, rather than selection, explain the patterns of variation observed. The second line of evidence is more direct: we showed that an OXA-R mutation, p.E142del, with an identical 102.5 kb flanking haplotype, is sampled from both West African and Caribbean schistosomes. This result strongly suggests that p.E142del alleles were present in West Africa prior to the transatlantic slave trade (1501-1867) (19), and were transferred to the New World on ships carrying West African slaves. Hence, OXA-R alleles were segregating within *S. mansoni* populations at least 470 years before deployment of OXA in the 1970s (20).

Our molecular data are backed up by clinical observations from the early use of OXA. Resistant parasites were detected in Brazil in the 1970s (21,22), before any mass drug administration (14). Similar observations of *S. mansoni* infected patients resistant to OXA treatment were made in East Africa (23). The existence of OXA-R parasites was confirmed experimentally by infecting mice with parasites isolated from patients that were parasite positive following drug treatment (21–23). Together these observations support the existence of segregating OXA-R alleles in schistosome populations before OXA deployment for parasite control.

### 2. Differences in OXA treatment efficacy between East and West Africa

Given the variation in OXA-R frequencies that we observe in different geographical samples, it is interesting to examine the literature on clinical treatment efficacy of OXA for treating

schistosomiasis patients. Early trials of OXA to treat patients with intestinal schistosomiasis resulted in multiple treatment failures in Egypt, East Africa and South Africa (23–27). As a consequence, the WHO recommended use of higher doses of OXA in East Africa, compared with West Africa (28). Human host metabolism did not explain this lack of efficacy because the OXA availability in blood was the same or higher in the East African patient populations than in West African or South American populations (29,30). Therefore, the presence of resistant parasites was the most likely explanation. OXA-R parasites were identified in Kenya by treating mice infected with parasites from patients showing poor treatment response (23). We observed a 14.91% frequency of OXA-R alleles (and 5.26% frequency of homozygous OXA-R parasites) in East Africa compared with 4.29% frequency of OXA-R alleles (and no homozygous OXA-R parasites) in West Africa. Our results provide a molecular explanation for the poor treatment response observed in East Africa, relative to other locations.

### 3. Implications for development of OXA derivatives

OXA kills *S. mansoni* but not *S. haematobium* or *S. japonicum*. OXA derivatives are currently under development to obtain more potent molecules acting against all three schistosome species. In fact, OXA derivatives that kill adult worms of the three main species of schistosomes infecting humans *in vitro* have now been developed (31). The low frequency of homozygous OXA-R parasites in *S. mansoni* suggests that OXA derivatives will result in imperfect cure rate for this species, particularly in East Africa. However, the primary purpose of generating OXA derivatives is to treat *S. haematobium* and *S. japonicum*, perhaps as a partner drug for praziquantel (PZQ). Examining natural variation in homologous sulfotransferase genes from these two species (*ShSULT-OR* and *SjSULT-OR*) to better understand the potential for resistance evolution will be critical if OXA derivatives are to be developed to control these parasites.

### 4. Implications of standing variation for drug resistance evolution

Standing variation in drug resistance genes has a major impact on how fast resistance evolves (2). If resistant alleles are already present in the population prior to treatment, drug resistance has the potential to spread much more rapidly because there is no waiting time for a resistance mutation to appear *de novo* (Fig. 7A) (3). An increasing number of examples support this view. The nematode *Caenorhabditis elegans* carries a large diversity of  $\beta$ -tubulin alleles allowing worms to be resistant to benzimidazoles (32). Similarly, the extremely high level of genetic diversity in the parasitic nematode *Haemonchus contortus* is responsible for the rapid emergence of resistance to benzimidazoles and other drug classes: resistance was usually detected within 10 years of drug introduction, consistent with standing variation or recurrent mutation (33,34). In the filarial worm *Onchocerca volvulus*, standing variation appears to be involved in resistance to ivermectin (6). Standing variation is also involved in herbicide resistance in plants: resistance alleles from the weed *Alopecurus myosuroides* were identified in plant collection almost 100 years before herbicides were used (35). Antibiotic resistance provides particularly dramatic examples of standing variation: plasmids encoding multidrug resistance were found in frozen bacteria isolated from the permafrost demonstrating that antibiotic resistance plasmids were already present thousands of years ago (36,37).

Drug resistance in parasitic helminths infecting livestock or humans is now recognized as a potential concern for control efforts, but was neglected for a long time using the argument that the slow reproduction rate of worms would greatly delay resistance evolution (38). The observation that resistance alleles exist as standing variation within multiple pathogen or parasite populations in the absence of drug treatment suggests previous optimism about the shelf life of drugs was poorly founded. If resistance alleles are already at relatively high frequency in populations when new drugs are deployed, resistance may evolve extremely rapidly (3,5).

In the case of OXA resistance, using an  $N_e$  estimate of 65,000 (39), OXA-R alleles spread from 15% starting frequency to fixation in 170 generations in 100% of simulations when selection is strong ( $s=0.1$ ). Assuming a generation time between 3 months and 1 year, this is equivalent to a period of 42.5 to 170 years (Fig. 7A). However, if OXA-R alleles were evolving *de novo*, simulations indicate that fixation will occur rarely (0.04% of the simulations) and this

would take 1,197 generations (corresponding to a period of 299.25 to 1,197 years) from the time a mutation arises. We can use the observed frequency of OXA-R alleles segregating in East African populations to make predictions about the spread of phenotypically resistant parasites (i.e. those homozygous for OXA-R alleles) (Fig 7B). If we use a frequency of 10% resistant parasites to denote unacceptable efficacy (this threshold is used for antimalarial drugs (40)) then this threshold will be reached in 19 to 444 generations (4.75 to 444 years) using a range of selection coefficients (from 0.01 to 0.2). The selection coefficients driving spread of drug resistance alleles in schistosomes is not known, but the range we have used covers measured selection coefficients driving drug resistance spread in another human parasite (*Plasmodium falciparum*) (41,42). These simulations suggest that, while OXA-R allele frequencies are relatively high in East Africa, OXA derivatives could still be extremely effective for schistosome control in the short-medium term, particularly if deployed as a combination therapy, partnered with a second drug with a different mode of action (e.g. PZQ).

Our simple models for predicting spread of OXA-R alleles under drug selection ignore fitness costs of OXA-R alleles, which might limit the rate of spread. The fitness cost of inactive SmSULT-OR in the absence of drug treatment still needs to be assessed accurately (13) but the occurrence of natural homozygotes for defective alleles suggests limited costs. The exact role of this enzyme in schistosome biology is not known. Sulfotransferases transfer the sulfo group from a donor (usually PAPS) to the substrate, resulting in inactivating or solubilizing of the substrate (43). Substrates can be endogenous signal molecules (hormones, neurotransmitters) or exogenous chemicals. In the latter case, sulfotransferases play a role in detoxifying natural or synthetic toxins (43), but sometimes they do the opposite by activating pro-drugs as observed with the anti-tumor drug N-benzyl indolecarbinols (44) or OXA (10,45). Because the same enzyme can sulfate both endogenous and exogenous compounds, it is often difficult to determine their exact biological role. In schistosomes, we speculate that SmSULT-OR could have roles in regulating endogenous molecules as well as detoxifying chemicals present in their environment (i.e. in the feces, water, snail or human blood, etc.).

## 5. Molecular markers for resistance surveillance

Molecular markers of OXA-R now allow efficient monitoring of the distribution of OXA-R alleles in schistosome populations. This approach is widely used for other parasites and pathogens such as malaria parasite (46) and HIV (47). For schistosome, collections such as SCAN which contain thousands of parasite samples from multiple locations (17) will be extremely valuable for this work: regular sampling in different endemic regions will help to update the resistance landscape. However, not all identified *SmSULT-OR* mutations will lead to resistance, so it is critical that molecular screening is paired with functional evaluation or computational prediction, as we have done here.

PZQ is the only drug currently available to treat schistosomiasis and effort in mass drug administration has recently been expanded 10 fold (48), with a target of administering 250 million treatments per year, increasing selective pressure for PZQ resistance. We suspect that standing variation for PZQ resistance is also likely, because this trait is easy to select in the laboratory. This has been done by several groups using independent laboratory populations, and resistance has spread within very few generations (49–54), strongly suggesting that resistance alleles were already present in these laboratory populations. Furthermore, the laboratory populations used for selection were isolated before PZQ was available (23,55) and so were not exposed to drug selection. Molecular markers for monitoring the frequency of PZQ-R in natural parasite populations would be extremely valuable, as demonstrated by our work on OXA-R.



## MATERIALS AND METHODS

### 1. Ethics statement

#### a. African samples

Samples from Senegal and Niger were collected as part of the EU-CONTRAST project (56), a multidisciplinary alliance to optimize schistosomiasis control and transmission surveillance in sub-Saharan Africa, as detailed in Webster *et al.* (57) with ethical approval granted by ethical committees of the Ministry of Health (Dakar, Senegal), and the Niger National Ethical Committee (Niamey, Niger) with additional ethical approval obtained from the St Mary's Hospital Local Ethics Research Committee, R&D office (part of the Imperial College Research Ethics Committee (ICREC; EC no. 03.36. R&D no. 03/SB/033E)), in combination with the ongoing CONTRAST and Schistosomiasis Control Initiative (SCI) activities.

For the Tanzanian samples collected as part of the Schistosomiasis Consortium for Operational Research and Evaluation (SCORE), ethical approvals were granted by the Imperial College Research Ethics Committee and the SCI Ethical approval (EC no. 03.36. R&D no. 03/SB/033E); the National Institute for Medical Research (NIMR, reference no. NIMR/HQ/R.8a/Vol. IX/1022); University of Georgia Institutional Review Boards, Athens, GA (2011-10353-1).

Following routine procedures in the field, the objectives of the study were first explained to the local village chiefs and political and religious authorities who gave their consent to conduct the study. Written consent for the schoolchildren to participate in longitudinal monitoring of the national control programme for schistosomiasis was given by head teachers, and/or village chiefs where there were no schools, due to the fact that in African villages, written consent of the child's guardian is often very difficult to obtain owing to the associated impoverished conditions and often low literacy. Each individual child also gave verbal consent before recruitment. Following sampling, a praziquantel treatment (40 mg.kg<sup>-1</sup>) was offered to infected participants.

## b. Omani samples

We obtained ethical clearance from the Sultan Qaboos University and the Ministry of Health of Oman to use positive stool samples for schistosomiasis collected by the Ministry of Health of Oman during epidemiological screening. Ethical approval was given by the Medical Research and Ethical Committee (MREC) of the Non-Communicable Disease Control Section of the Directorate General of Health Affairs, Headquarters, Ministry of Health, Oman (no. MH/DGHA/DSDC/NCD/R&S/167/01).

We obtained ethical approvals of animal studies in France from the French Ministère de l'Éducation Nationale, de la Recherche et de la Technologie, from the French Ministère de l'Agriculture et de la Pêche (agreement no. A 66040), and from the French Direction Départementale de la Protection des Populations (no. C 66-136-01 with prefectural order no. 2012-201-0008). Certificate for animal experimentation was given to H.M. (authorization no. C 66.11.01; articles no. R 214-87, R 214-122 and R 215-10). Housing, breeding and animal care followed the guidelines of the French CNRS. The different protocols used in this study had been approved by the French veterinary agency from the DRAAF Languedoc-Roussillon (Direction Régionale de l'Alimentation, de l'Agriculture et de la Forêt), Montpellier, France (authorization no. 007083).

## 2. Sampling

### a. African samples

*S. mansoni* miracidia were collected from individual patients in three different West African countries in 2007: 27 patients from two locations in Senegal, and 17 patients from two locations in Niger (Supp. table 2) (57,58). Additionally, *S. mansoni* miracidia were collected as part of the SCORE program from 64 children in seven villages on the shores of Lake Victoria in Tanzania (East Africa) in January 2012 (Supp. table 2) (59).

Collection of miracidia was performed as previously described (57,60). Briefly, individual stool samples from positive patients were homogenized through a mesh and washed through with water. The content was then transferred in a Pitchford funnel assembly, washed with

additional water, and the filtered homogenate was drained into a Petri dish. The Petri dish containing the homogenate was then left in bright ambient light (not direct sunlight) to allow hatching of miracidia. Miracidia were visualized under a dissecting microscope and individually captured in 3-5  $\mu\text{L}$  of water using a micropipette. Miracidia were then pipetted individually onto Whatman FTA cards for DNA preservation. Cards were allowed to dry for 1 hour and then stored for future research (57,58,60).

#### b. Omani samples

The Omani schistosome samples were collected during 8 field trips, from 2001 to 2015, in different areas in Dhofar, Oman and originated from either *Homo sapiens*, *Rattus rattus* or *Biomphalaria pfeifferi* (Supp. table 2): 11 patients from 4 localities, 2 rats from 2 localities, 26 snails from 3 localities.

We obtained schistosome adult worms from naturally infected rats and from laboratory infected mice. The mice were infected with cercariae from naturally infected snails or from laboratory snails infected with miracidia isolated from stool samples. We collected miracidia from stool samples as described in Moné *et al.* (61). We exposed *Biomphalaria pfeifferi* snails to miracidia as described in Mouahid *et al.* (62). We maintained laboratory and naturally infected snails at constant temperature (26°C) and balanced photoperiod (12h light / 12h dark) and fed them with fresh lettuce *ad libitum*. Prior to infection, we anaesthetized the mice by intraperitoneal injection of an anesthetic solution (0.01  $\text{mL.g}^{-1}$  of mouse body weight). We prepared the anaesthetic solution using 0.5 mL of Rompun (20  $\text{mg.mL}^{-1}$ ; Bayer) and 1 mL of Imalgène (100  $\text{mg.mL}^{-1}$ ; Rhône Mérieux) diluted in 8.5 mL of autoclaved NaCl 8.5 ‰. Abdomens of anesthetized mice were shaved and exposed during 1 hour to cercariae shed from laboratory or naturally infected snails. Cercariae from naturally infected snails were kept in 95° ethanol when the number of cercariae was too low for mouse infection. Laboratory infected mice or naturally infected rats were euthanized by intraperitoneal injection of sodium pentobarbital solution (1.1 mL diluted in 10 mL of ethanol 10%). We recovered adult worms by perfusion (63); the worms were washed in NaCl 8.5 ‰, and single worms (female or male) were fixed in 95°

ethanol and preserved at -20°C. Worms and cercariae were washed in 1X TE buffer for 1 hour prior to DNA extraction.

### 3. DNA processing and library preparation

We amplified DNA and sequenced exomes from single miracidia preserved on FTA cards (1 miracidium per patient) for African samples or from DNA extracted from worms or cercariae for Omani samples. FTA-preserved samples were processed following our published protocol (64). Briefly we punched a 2 mm disc containing the miracidium from the FTA card, washed it with the FTA Purification Reagent (GE Healthcare Life Sciences), rinsed it twice with TE<sup>-1</sup> buffer, and finally dried it. DNA from single worms and cercariae were extracted using the DNeasy Blood and Tissue kit (Qiagen) following the tissue protocol with an incubation time of 2h at 56°C and an elution in 200 µL. Samples were quantified using the Qubit dsDNA HS assay kit (Invitrogen).

We then performed whole genome amplification (WGA) on each FTA punch or on 2 µL or 4 µL of DNA solution using the Illustra GenomiPhi V2 DNA Amplification kit (GE Healthcare Life Sciences). Amplified DNA was purified with the SigmaSpin™ Sequencing reaction Clean-up (Sigma-Aldrich), following the manufacturer protocol. We quantified purified samples using the Qubit dsDNA BR assay (Invitrogen). DNA samples that failed WGA were cleaned up and concentrated using the Genomic DNA Clean & Concentrator kit (Zymo Research) following the manufacturer protocol and these samples with concentrated DNA were used to perform a new WGA.

Because WGA reactions are non-specific, we performed qPCR on each sample from FTA cards to quantify proportion of schistosome DNA (i.e., check for an excess of amplified DNA from the environment (water, fecal matter, etc.)). We excluded samples that showed less than 100 schistosome genomes copies in 20 ng of DNA which were not suitable for subsequent exome capture. We assessed genome copies by quantifying the *S. mansoni*  $\alpha$ -tubulin single copy gene (64).

We prepared exome capture libraries on the selected African samples and on all the successfully amplified Omani samples using the pre-capture pooling method of the SureSelect XT<sup>2</sup> Target Enrichment System (Agilent) (64). Finally, we sequenced libraries on a HiSeq 2500 and data were demultiplexed using the Casava pipeline.

#### 4. Alignment, variant calling and phasing

We aligned sequences as described in Le Clec'h *et al.* (64). Briefly, we aligned data against the v5 *S. mansoni* genome using BWA and SAMtools, realigned around indels using GATK, PCR duplicates were marked using picard and Q-score were recalibrated using GATK.

To identify variants in the *SmSULT-OR* (Smp\_089320) gene, we performed a variant calling using FreeBayes (v1.1.0-46-g8d2b3a0) (65) in the first 3 Mb of the chromosome 6. We used a minimum base quality (-q) of 20 and a minimum mapping quality (-m) of 30. We included mutation sites identified previously (10,13) in order to genotype these sites specifically for further comparison. We defined 4 populations: Caribbean (HR), West Africa (SN and NE), East Africa (TZ) and Middle-East (OM). We excluded variants supported by less than 4 reads using VCFtools (v0.1.14) (66). We then used vcf-subset from VCFtools to remove sites with reference alleles only. We adjusted variant positions using vt normalize (v0.5772-60f436c3) (67). We finally used Beagle (v4.1) (68) to first estimate genotypes and to then phase data. Unphased variant calling data and scripts used to generate analyze the data are available on Zenodo (<https://doi.org/10.5281/zenodo.2850876>).

#### 5. Genetics analysis

We performed all the genetics analysis using phased exome data. We handled the VCF data in R (R v3.5.0 (69)) using the vcfR package (v1.8.0.9) (70). We determined the longest haplotype block from the samples carrying the p.E142del using a custom R code after filtering invariable sites in these samples. We built the haplotype network using the R package poppr (v2.8.1) (71,72) after selecting variants within the longest haplotype coordinates showing no more than

20% of missing data. We computed the frequency of the OXA-R allele using a custom R script and functional annotation obtained through a custom bash script.

We generated haplotype sequences of the coding sequence only for the Old World samples using the updated phased VCF data exported from R and the BCFtools (v1.2) (73). We generated haplotypes of the South American samples from previous genotyping using a custom bash script. We included the *SmSULT-OR* homologue sequence from *S. rodhaini* previously identified (13). We aligned the haplotypes using Clustal Omega (v1.2.2) (74). We determined nucleotide diversity, number of synonymous and non-synonymous sites using DnaSP software (v6.12.01) (75). Populations were defined as described in the previous section. Scripts used to analyze the data are available on Zenodo.

## 6. Recombinant SmSULT-OR protein production and OXA activation assay

We produced recombinant SmSULT-OR proteins following Chevalier *et al.* (13). Briefly, mutations were introduced in the cloned *SmSULT-OR* gene sequence (Smp\_089320; GenBank accession no. HE601629.1) and introduced into *Escherichia coli* for protein production. Proteins were extracted from bacterial culture and purified on an affinity chromatography column. His-tag was removed using Tobacco etch virus (TEV) protease, the solution was dialyzed overnight and passed through affinity chromatography again to remove His-tag and TEV protease. The sample was loaded onto a GE-pre-packed Q anion exchange column and eluted, and the pooled fractions were dialyzed overnight. The protein was finally concentrated at 10 mg.mL<sup>-1</sup>.

We tested the impact of a subset of the mutations observed on OXA activation using an *in vitro* assay (13). We tested the ability of recombinant SmSULT-OR proteins to activate OXA in a protease inhibitor cocktail with sheared *S. mansoni* gDNA as a final target for the tritiated OXA pre-mixed with ATP, MgCl<sub>2</sub> and PAPS co-factor. After 2.5 h of incubation at 37°C, the reaction was stopped and DNA was extracted three times. Radioactivity in the remaining aqueous phase containing the DNA and in water (blank) was counted in a liquid scintillation spectrometer. Blank values were subtracted from sample values. We performed three independent reactions for each recombinant protein.

## 7. Evaluation of impact of mutations on protein stability

We first visually assessed the scored mutations on the SmSULT-OR protein structure (PDB code 4MUB (10)) using the mutagenesis function of PyMol software (v2.3.0; Schrödinger, LLC).

We then used the Rosetta package (v3.9) to test the impact of scored mutations on protein stability. We used the `ddg_monomer` application to compute the difference in free enthalpy ( $\Delta\Delta G$ ) between the mutated (amino acid substitutions only) and the wild-type protein. The higher the  $\Delta\Delta G$ , the more unstable is the mutated protein. For this, we prepared ligand files (OAQ and A3P) by downloading SDF files containing all ligand structures from SmSULT-OR crystals available from the Protein Data Bank website. We modified SDF files to add hydrogens using Openbabel (v2.4.0) (76), and generated params files using `molfile_to_params.py` from Rosetta. We used the structure of SmSULT-OR to generate a constraint file using the `minimize_with_cst` application and the `convert_to_cst_file.sh` script. We removed ligand information from the constraint file. For each mutation, we finally generated a resfile and ran the `ddg_monomer` application with 50 iterations and options adapted from the protocol 16 of Kellogg *et al.* (77). Scripts used to analyze the data are available on Zenodo.

## 8. Statistical analysis

We conducted statistical analyzes using R (v3.5.0) (69). We performed simulations using a modified version of the driftR simulator (78). The OXA activation assay data were tested for normality using a Shapiro-Wilk and compared by a parametric ANOVA followed by a tukey post-hoc test.

## ACKNOWLEDGMENTS

This study was supported by NIH grants [R01-AI097576 (T.J.C.A.), R21-AI096277 (T.J.C.A.), R01-AI133749 (T.J.C.A.), R01-AI115691 and P50-AI098507 (P.T.L./P.J.H.)], World Health Organization [HQNTD1206356 (P.T.L.)], by the National Center for Advancing Translational Sciences (CTSA/IIMS award no. UL1-TR001120), the UTHSCSA Presidents Collaborative Research Fund (P.T.L./P.J.H.) and the Robert A. Welch Foundation [AQ-1399 (P.J.H.)]. The molecular work at Texas Biomed was conducted in facilities constructed with support from Research Facilities Improvement Program Grant (C06-RR013556) from the National Center for Research Resources (NIH). The AT&T Genomics Computing Center supercomputing facilities were supported by the AT&T Foundation and the National Center for Research Resources Grant (S10-RR029392). The X-ray Crystallography Core Laboratory is a part of the Institutional Research Cores at the University of Texas Health Science Center at San Antonio supported by the Office of the Vice President for Research and the Mays Cancer Center (NIH P30-CA054174). W.L was supported by a Cowles fellowship from Texas Biomedical Research Institute.

CONTRAST was funded by the European Commission (FP6 STREP contract no. 032203). SCORE (<https://score.uga.edu/>) activities were funded by the University of Georgia Research Foundation Inc. (prime award no. 50816, sub awards RR374-053/4785416 and RR374-053/4785426), which is funded by the Bill & Melinda Gates Foundation for SCORE projects. SCAN is funded with support from the Wellcome Trust (grant no. 104958/Z/14/Z). For the samples collected as part of the EU-CONTRAST project we would like to thank Dr. Oumar T. Diaw and Dr. Moumoudane M. Seye (Institut Sénégalais de Recherches Agricoles, ISRA, route des Hydrocarbures, Bel Air, Dakar, Senegal) for their coordination of the field work and the collections in Senegal and Dr. Mariama Lamine for fieldwork coordination and the RISEAL team for collections in Niger. Also, we would like to thank Dr. Fiona Allan and Ms. Muriel Rabone for sample and data curation and preparation for material held in SCAN. For the collection of the Tanzania SCORE samples we would also like to acknowledge the hard work of Ms. Teckla Angelo for the fieldwork coordination, and Mr. Honest Nagai, Mr. Boniface Emmanuel, Mr. John Igogote, Dr. Sarah Buddenborg and Mr. Reuben Jonathan for collections in Tanzania. Dr. David Rollinson, Prof. Joanne Webster, Dr. Anouk Gouvras, Dr. Bonnie Webster and Dr. Aidan Emery



583 are members of the London Centre for Neglected Tropical Disease Research, a collaboration  
584 between the London School of Hygiene & Tropical Medicine, the Natural History Museum, the  
585 Royal Veterinary College, Imperial College London and the Sanger Institute.

586 All the biological material from Oman was obtained thanks to the financial supports from  
587 the Ministry of Health in Oman, the Sultan Qaboos University (grant no. IG/MED/MICR/00/01),  
588 the French Ministry of Foreign Affairs (French Embassy in Oman) (grants nos. 402419B,  
589 402415K and 339660F), the CNRS-Sciences de la Vie (grants no. 01N92/0745/1 and  
590 02N60/1340), the CNRS-Direction des Relations internationales (grants no. 01N92/0745 and  
591 02N60/1340, and the PICS-CNRS no. 06249 : FRANC-INCENSE), the University of Perpignan and  
592 the National Institute of Health (NIH) (grant no. R01-AI133749 T.J.C.A.; Subaward no. 53409  
593 H.M.).

## REFERENCES

1. Barrett RDH, Schluter D. Adaptation from standing genetic variation. Trends in ecology & evolution. 2008 Jan;23(1):38–44.
2. Hermisson J, Pennings PS. Soft sweeps: molecular population genetics of adaptation from standing genetic variation. Genetics. 2005 Apr;169(4):2335–52.
3. Messer PW, Petrov DA. Population genomics of rapid adaptation by soft selective sweeps. Trends Ecol Evol. 2013 Nov;28(11):659–69.
4. Orr HA, Betancourt AJ. Haldane's sieve and adaptation from the standing genetic variation. Genetics. 2001 Feb;157(2):875–84.
5. Hawkins NJ, Bass C, Dixon A, Neve P. The evolutionary origins of pesticide resistance. Biological reviews of the Cambridge Philosophical Society. 2018 Jul;
6. Doyle SR, Bourguinat C, Nana-Djeunga HC, Kengne-Ouafo JA, Pion SDS, Bopda J, et al. Genome-wide analysis of ivermectin response by *Onchocerca volvulus* reveals that genetic drift and soft selective sweeps contribute to loss of drug sensitivity. PLoS neglected tropical diseases. 2017 Jul;11(7):e0005816.
7. Diawara A, Schwenkenbecher JM, Kaplan RM, Prichard RK. Molecular and biological diagnostic tests for monitoring benzimidazole resistance in human soil-transmitted helminths. The American journal of tropical medicine and hygiene. 2013 Jun;88(6):1052–61.
8. Pullan RL, Smith JL, Jasrasaria R, Brooker SJ. Global numbers of infection and disease burden of soil transmitted helminth infections in 2010. Parasites & vectors. 2014 Jan;7:37.
9. Pica-Mattoccia L, Novi A, Cioli D. Enzymatic basis for the lack of oxamniquine activity in *Schistosoma haematobium* infections. Parasitol Res. 1997;83(7):687–9.
10. Valentim CLL, Cioli D, Chevalier FD, Cao X, Taylor AB, Holloway SP, et al. Genetic and molecular basis of drug resistance and species-specific drug action in Schistosome parasites. Science. 2013;342(6164):1385–9.
11. Rogers SH, Bueding E. Hycanthon resistance: development in *Schistosoma mansoni*. Science. 1971 Jun;172(3987):1057–8.
12. Pica-Mattoccia L, Dias LC, Cioli D. Genetic complementation analysis of two independently isolated hycanthon-resistant strains of *Schistosoma mansoni*. Mem Inst Oswaldo Cruz. 1992;87 Suppl 4:211–4.
13. Chevalier FD, Le Clec'h W, Eng N, Rugel AR, Assis RR de, Oliveira G, et al. Independent origins of loss-of-function mutations conferring oxamniquine resistance in a Brazilian schistosome population. Int J Parasitol. 2016 Jun;46(27):417–24.

- 628 14. Coura JR, Amaral RS. Epidemiological and control aspects of schistosomiasis in Brazilian endemic  
629 areas. Mem Inst Oswaldo Cruz. 2004;99(5 Suppl 1):13–9.
- 630 15. Foster R. A review of clinical experience with oxamniquine. Transactions of the Royal Society of  
631 Tropical Medicine and Hygiene. 1987;81(1):55–9.
- 632 16. Hotez PJ, Bundy DA, Beegle K, Brooker S, Drake L, de Silva N, et al. Disease Control Priorities in  
633 Developing Countries. In: Jamison D, Breman J, AR, M, *et al.*, editors. 2nd ed. Washington (DC):  
634 Oxford University Press & World Bank; 2006. p. 467–82. Available from:  
635 <http://www.ncbi.nlm.nih.gov/books/NBK11748/>
- 636 17. Emery AM, Allan FE, Rabone ME, Rollinson D. Schistosomiasis collection at NHM (SCAN). Parasit  
637 Vectors. 2012;5:185.
- 638 18. Cioli D, Pica-Mattoccia L, Moroni R. *Schistosoma mansoni*: hycanthone/oxamniquine resistance is  
639 controlled by a single autosomal recessive gene. Exp Parasitol. 1992 Dec;75(4):425–32.
- 640 19. Eltis D, Richardson D, Blight DW. Atlas of the Transatlantic Slave Trade [Internet]. Yale University  
641 Press; 2010. Available from: <http://www.jstor.org/stable/j.ctt5vm1s4>
- 642 20. Katz N, Pellegrino J, Grinbaum E, Chaves A, Zicker F. Preliminary clinical trials with oxamniquine, a  
643 new antischistosomal agent. Rev Inst Med Trop Sao Paulo. 1973;15(1):25–9.
- 644 21. Katz N, Dias EP, Araújo N, Souza CP. Estudo de uma cepa humana de *Schistosoma mansoni*  
645 resistente a agentes esquistossomicidas. Rev Soc Bras Med Trop. 1973 Dec;7(6):381–7.
- 646 22. Dias, L. C. de S. AND Pedro, R. J. AND Rigo, E. AND Goto, M. M. F. AND Mafrá, G. L. Linhagem  
647 humana de *Schistosoma mansoni* resistente a esquistossomicidas. Revista de Saúde Pública. 1978  
648 Mar;12:110–110.
- 649 23. Coles GC, Mutahi WT, Kinoti GK, Bruce JI, Katz N. Tolerance of Kenyan *Schistosoma mansoni* to  
650 oxamniquine. Transactions of the Royal Society of Tropical Medicine and Hygiene. 1987;81(5):782–  
651 5.
- 652 24. Gupta KK. *Schistosoma mansoni* treatment with oral oxamniquine in Zambia. East African medical  
653 journal. 1984 Aug;61(8):641–4.
- 654 25. Omer AH. Oxamniquine for treating *Schistosoma mansoni* infection in Sudan. British medical  
655 journal. 1978 Jul;2(6131):163–5.
- 656 26. Ongom VL, Wamboka GW, Kadil AUK. Oxamniquine (UK 4271): a potential antischistosomal drug in  
657 the treatment of *Schistosoma mansoni* infections in Uganda. The East African medical journal.  
658 1976 Aug;53:505.
- 659 27. Pitchford RJ, Lewis M. Oxamniquine in the treatment of various schistosome infections in South  
660 Africa. S Afr Med J. 1978 Apr;53(17):677–80.

- 661 28. World Health Organization. WHO model prescribing information: drugs used in parasitic diseases  
662 [Internet]. World Health Organization; 1995. Available from:  
663 <http://apps.who.int/medicinedocs/en/d/Jh2922e/>
- 664 29. Daneshmend TK, Homeida MA. Oxamniquine pharmacokinetics in hepatosplenic schistosomiasis in  
665 the Sudan. The Journal of antimicrobial chemotherapy. 1987 Jan;19(1):87–93.
- 666 30. Kokwaro GO, Taylor G. Oxamniquine pharmacokinetics in healthy Kenyan African volunteers. East  
667 African medical journal. 1991 May;68(5):359–64.
- 668 31. Rugel A, Tarpley RS, Lopez A, Menard T, Guzman MA, Taylor AB, et al. Design, Synthesis, and  
669 Characterization of Novel Small Molecules as Broad Range Antischistosomal Agents. ACS medicinal  
670 chemistry letters. 2018 Oct;9(10):967–73.
- 671 32. Hahnel SR, Zdraljevic S, Rodriguez BC, Zhao Y, McGrath PT, Andersen EC. Extreme allelic  
672 heterogeneity at a *Caenorhabditis elegans* beta-tubulin locus explains natural resistance to  
673 benzimidazoles. PLoS pathogens. 2018 Oct;14(10):e1007226.
- 674 33. Gilleard JS, Redman E. Genetic Diversity and Population Structure of *Haemonchus contortus*.  
675 Advances in parasitology. 2016;93:31–68.
- 676 34. Kotze AC, Prichard RK. Anthelmintic Resistance in *Haemonchus contortus*: History, Mechanisms  
677 and Diagnosis. Advances in parasitology. 2016;93:397–428.
- 678 35. Délye C, Deulvot C, Chauvel B. DNA analysis of herbarium Specimens of the grass weed *Alopecurus*  
679 *myosuroides* reveals herbicide resistance pre-dated herbicides. PloS one. 2013;8(10):e75117.
- 680 36. D’Costa VM, King CE, Kalan L, Morar M, Sung WWL, Schwarz C, et al. Antibiotic resistance is  
681 ancient. Nature. 2011 Aug;477(7365):457–61.
- 682 37. Perry J, Waglechner N, Wright G. The Prehistory of Antibiotic Resistance. Cold Spring Harbor  
683 perspectives in medicine. 2016 Jun;6(6).
- 684 38. Geerts S, Gryseels B. Drug resistance in human helminths: current situation and lessons from  
685 livestock. Clinical microbiology reviews. 2000 Apr;13(2):207–22.
- 686 39. Crellen T, Allan F, David S, Durrant C, Huckvale T, Holroyd N, et al. Whole genome resequencing of  
687 the human parasite *Schistosoma mansoni* reveals population history and effects of selection.  
688 Scientific Reports. 2016 Feb;6:20954.
- 689 40. Organization WH. Artemisinin resistance and artemisinin-based combination therapy efficacy:  
690 status report [Internet]. Organization WH, editor. World Health Organization; 2018. Available  
691 from: <https://apps.who.int/iris/bitstream/handle/10665/274362/WHO-CDS-GMP-2018.18-eng.pdf>
- 692 41. Nair S, Williams JT, Brockman A, Paiphun L, Mayxay M, Newton PN, et al. A selective sweep driven  
693 by pyrimethamine treatment in southeast asian malaria parasites. Molecular biology and  
694 evolution. 2003 Sep;20(9):1526–36.

42. Anderson TJC, Nair S, McDew-White M, Cheeseman IH, Nkhoma S, Bilgic F, et al. Population Parameters Underlying an Ongoing Soft Sweep in Southeast Asian Malaria Parasites. *Molecular biology and evolution*. 2017 Jan;34(1):131–44.
43. Negishi M, Pedersen LG, Petrotchenko E, Shevtsov S, Gorokhov A, Kakuta Y, et al. Structure and function of sulfotransferases. *Archives of biochemistry and biophysics*. 2001 Jun;390(2):149–57.
44. Rothman DM, Gao X, George E, Rasmusson T, Bhatia D, Alimov I, et al. Metabolic Enzyme Sulfotransferase 1A1 Is the Trigger for N-Benzyl Indole Carbinol Tumor Growth Suppression. *Chemistry & Biology*. 2015 Sep;22(9):1228–37.
45. Pica-Mattoccia L, Carlini D, Guidi A, Cimica V, Vigorosi F, Cioli D. The schistosome enzyme that activates oxamniquine has the characteristics of a sulfotransferase. *Mem Inst Oswaldo Cruz*. 2006 Sep;101 Suppl 1:307–12.
46. Nsanzabana C, Djalle D, Guérin PJ, Ménard D, González IJ. Tools for surveillance of anti-malarial drug resistance: an assessment of the current landscape. *Malaria journal*. 2018 Feb;17(1):75.
47. Keating P, Pharris A, Leitmeyer K, De Angelis S, Wensing A, Amato-Gauci AJ, et al. Assessment of HIV molecular surveillance capacity in the European Union, 2016. *Eurosurveillance*. 2017 Dec;22(49).
48. Fenwick A. Praziquantel: do we need another antischistosome treatment? *Future medicinal chemistry*. 2015;7(6):677–80.
49. Fallon PG, Doenhoff MJ. Drug-resistant schistosomiasis: resistance to praziquantel and oxamniquine induced in *Schistosoma mansoni* in mice is drug specific. *Am J Trop Med Hyg*. 1994 Jul;51(1):83–8.
50. Couto FFB, Coelho PMZ, Araújo N, Kusel JR, Katz N, Jannotti-Passos LK, et al. *Schistosoma mansoni*: a method for inducing resistance to praziquantel using infected *Biomphalaria glabrata* snails. *Mem Inst Oswaldo Cruz*. 2011 Mar;106(2):153–7.
51. Lotfy WM, Hishmat MG, El Nashar AS, Abu El Einin HM. Evaluation of a method for induction of praziquantel resistance in *Schistosoma mansoni*. *Pharmaceutical biology*. 2015 Aug;53(8):1214–9.
52. Pinto-Almeida A, Mendes T, Armada A, Belo S, Carrilho E, Viveiros M, et al. The Role of Efflux Pumps in *Schistosoma mansoni* Praziquantel Resistant Phenotype. *PloS one*. 2015;10(10):e0140147.
53. Lamberton PHL, Faust CL, Webster JP. Praziquantel decreases fecundity in *Schistosoma mansoni* adult worms that survive treatment: evidence from a laboratory life-history trade-offs selection study. *Infectious diseases of poverty*. 2017 Jun;6(1):110.
54. Sanchez MC, Cupit PM, Bu L, Cunningham C. Transcriptomic analysis of reduced sensitivity to praziquantel in *Schistosoma mansoni*. *Molecular and biochemical parasitology*. 2019 Mar;228:6–15.

- 730 55. Lewis FA, Stirewalt MA, Souza CP, Gazzinelli G. Large-scale laboratory maintenance of *Schistosoma*  
731 *mansoni*, with observations on three schistosome/snail host combinations. J Parasitol. 1986  
732 Dec;72(6):813–29.
- 733 56. Utzinger J, Brattig NW, Kristensen TK. Schistosomiasis research in Africa: how the CONTRAST  
734 alliance made it happen. Acta Tropica. 2013 Nov;128(2):182–95.
- 735 57. Webster BL, Webster JP, Gouvras AN, Garba A, Lamine MS, Diaw OT, et al. DNA “barcoding” of  
736 *Schistosoma mansoni* across sub-Saharan Africa supports substantial within locality diversity and  
737 geographical separation of genotypes. Acta Trop. 2013 Nov;128(2):250–60.
- 738 58. Gower CM, Gouvras AN, Lamberton PHL, Deol A, Shrivastava J, Mutombo PN, et al. Population  
739 genetic structure of *Schistosoma mansoni* and *Schistosoma haematobium* from across six sub-  
740 Saharan African countries: Implications for epidemiology, evolution and control. Acta Trop. 2013  
741 Nov;128(2):261–74.
- 742 59. Ezeamama AE, He C-L, Shen Y, Yin X-P, Binder SC, Campbell CH, et al. Gaining and sustaining  
743 schistosomiasis control: study protocol and baseline data prior to different treatment strategies in  
744 five African countries. BMC Infect Dis. 2016 26;16:229.
- 745 60. Gower CM, Shrivastava J, Lamberton PHL, Rollinson D, Webster BL, Emery A, et al. Development  
746 and application of an ethically and epidemiologically advantageous assay for the multi-locus  
747 microsatellite analysis of *Schistosoma mansoni*. Parasitology. 2007 Apr;134(Pt 4):523–36.
- 748 61. Moné H, Holtfreter MC, Allienne J-F, Mints-Nguéma R, Ibikounlé M, Boissier J, et al. Introgressive  
749 hybridizations of *Schistosoma haematobium* by *Schistosoma bovis* at the origin of the first case  
750 report of schistosomiasis in Corsica (France, Europe). Parasitology research. 2015  
751 Nov;114(11):4127–33.
- 752 62. Mouahid G, Mints Nguema R, Al Mashikhi KM, Al Yafae SA, Idris MA, Moné H. Host-parasite life-  
753 histories of the diurnal vs. nocturnal chronotypes of *Schistosoma mansoni*: adaptive significance.  
754 Tropical medicine & international health : TM & IH. 2019 Mar;
- 755 63. Duvall RH, DeWitt WB. An improved perfusion technique for recovering adult schistosomes from  
756 laboratory animals. Am J Trop Med Hyg. 1967 Jul;16(4):483–6.
- 757 64. Le Clec’h W, Chevalier FD, McDew-White M, Allan F, Webster BL, Gouvras AN, et al. Whole  
758 genome amplification and exome sequencing of archived schistosome miracidia. Parasitology.  
759 2018 May;1–9.
- 760 65. Garrison E, Marth G. Haplotype-based variant detection from short-read sequencing. 2012 Jul 17;  
761 Available from: <http://arxiv.org/pdf/1207.3907v2>
- 762 66. Danecek P, Auton A, Abecasis G, Albers CA, Banks E, DePristo MA, et al. The variant call format and  
763 VCFtools. Bioinformatics. 2011 Aug;27(15):2156–8.
- 764 67. Tan A, Abecasis GR, Kang HM. Unified representation of genetic variants. Bioinformatics (Oxford,  
765 England). 2015 Jul;31(13):2202–4.

766 68. Browning SR, Browning BL. Rapid and accurate haplotype phasing and missing-data inference for  
767 whole-genome association studies by use of localized haplotype clustering. *American journal of*  
768 *human genetics*. 2007 Nov;81(5):1084–97.

769 69. R Core Team. R: A Language and Environment for Statistical Computing [Internet]. Vienna, Austria;  
770 2015. Available from: <http://www.R-project.org/>

771 70. Knaus BJ, Grünwald NJ. VCFR: a package to manipulate and visualize variant call format data in R.  
772 *Molecular ecology resources*. 2017 Jan;17(1):44–53.

773 71. Kamvar ZN, Tabima JF, Grünwald NJ. Poppr: an R package for genetic analysis of populations with  
774 clonal, partially clonal, and/or sexual reproduction. *PeerJ*. 2014;2:e281.

775 72. Kamvar ZN, Brooks JC, Grünwald NJ. Novel R tools for analysis of genome-wide population genetic  
776 data with emphasis on clonality. *Frontiers in genetics*. 2015;6:208.

777 73. Li H. A statistical framework for SNP calling, mutation discovery, association mapping and  
778 population genetical parameter estimation from sequencing data. *Bioinformatics*. 2011 Nov  
779 1;27(21):2987–93.

780 74. Sievers F, Wilm A, Dineen D, Gibson TJ, Karplus K, Li W, et al. Fast, scalable generation of high-  
781 quality protein multiple sequence alignments using Clustal Omega. *Mol Syst Biol*. 2011 Oct  
782 11;7:539.

783 75. Rozas J, Ferrer-Mata A, Sánchez-DelBarrio JC, Guirao-Rico S, Librado P, Ramos-Onsins SE, et al.  
784 DnaSP 6: DNA Sequence Polymorphism Analysis of Large Data Sets. *Molecular Biology and*  
785 *Evolution*. 2017 Dec 1;34(12):3299–302.

786 76. O’Boyle NM, Banck M, James CA, Morley C, Vandermeersch T, Hutchison GR. Open Babel: An open  
787 chemical toolbox. *Journal of Cheminformatics*. 2011;3(1):33.

788 77. Kellogg EH, Leaver-Fay A, Baker D. Role of conformational sampling in computing mutation-  
789 induced changes in protein structure and stability. *Proteins*. 2011 Mar;79(3):830–8.

790 78. Battey C. Cjbattey/Driftr: Driftr\_V1.3 [Internet]. Zenodo; 2017 [cited 2019 May 13]. Available from:  
791 <https://zenodo.org/record/345172>

792 79. Ogino S, Gulley ML, den Dunnen JT, Wilson RB, , Association for Molecular Pathology Training,  
793 Committee E. Standard mutation nomenclature in molecular diagnostics: practical and  
794 educational challenges. *J Mol Diagn*. 2007 Feb;9(1):1–6.

796 **TABLES**

797

798

799 **Table 1 – Summary statistics for sequence variation in *SmSULT-OR*.**

800

| Location                            | Nucleotide diversity<br>( $\pi \pm$ standard deviation) | Dn | Pn | Ds | Ps | N      | S      | pN/pS | Ka/Ks   |
|-------------------------------------|---------------------------------------------------------|----|----|----|----|--------|--------|-------|---------|
| South America (Brazil) <sup>a</sup> | $0.00021 \pm 0.3 \times 10^{-4}$                        | 17 | 4  | 23 | 0  | 596.19 | 162.81 | N/C   | 0.20184 |
| West Africa (Senegal / Niger)       | $0.00126 \pm 1.7 \times 10^{-4}$                        | 18 | 10 | 23 | 2  | 599.02 | 162.98 | 1.36  | 0.21293 |
| East Africa (Tanzania)              | $0.00195 \pm 2 \times 10^{-4}$                          | 18 | 18 | 23 | 9  | 591.83 | 161.17 | 0.545 | 0.21312 |
| Middle East (Oman)                  | $0.02424 \pm 2.4 \times 10^{-4}$                        | 10 | 15 | 11 | 36 | 598.91 | 160.09 | 0.111 | 0.243   |
| Overall                             | $0.01224 \pm$ N/C                                       | 10 | 39 | 11 | 40 | 583.59 | 157.41 | 0.263 | 0.24521 |

801

802 <sup>a</sup> Data from Brazil from a previous study (13) added for comparison.

803 Dn, Ds: Number of fixed non-synonymous and synonymous differences between species (*S. mansoni* and *S. rodhaini*)

804 Pn, Ps: Number of polymorphic non-synonymous and synonymous differences within species (*S. mansoni*)

805 N: Number of non-synonymous sites

806 S: Number of synonymous sites

807  $pN/pS = (Pn/N)/(Ps/S)$

808  $Ka/Ks = (Dn/N)/(Ds/S)$

809 N/C: not calculable



810 **Table 2 – OXA-R mutations scored in the *Schistosoma mansoni* SmSULT-OR gene and their frequency in the New and Old World.**

| Nucleic acid mutation | Amino acid mutation | Mutation frequency                           |                                              |                                |                             |
|-----------------------|---------------------|----------------------------------------------|----------------------------------------------|--------------------------------|-----------------------------|
|                       |                     | South America (Brazil) <sup>a</sup><br>n=189 | West Africa (Senegal / Niger)<br>n=25 / n=10 | East Africa (Tanzania)<br>n=57 | Middle East (Oman)<br>n=112 |
| c.3dupGTTTATCCATAATG  | p.I2VfsX3           | -                                            | -                                            | 0.0096                         | -                           |
| c.35C>A               | p.S12X              | -                                            | 0.014                                        | -                              | -                           |
| c.103T>C              | p.C35R              | 0.0027                                       | -                                            | -                              | -                           |
| c.358T>C              | p.W120R             | -                                            | -                                            | 0.0510                         | 0.065                       |
| c.424_426delGAA       | p.E142del           | 0.008                                        | 0.035                                        | 0.0098                         | -                           |
| c.510delT             | p.N171lfsX28        | -                                            | -                                            | 0.0625                         | -                           |
| c.536T>C              | p.L179P             | -                                            | -                                            | 0.0089                         | -                           |
| Total frequency       |                     | 0.0107                                       | 0.044                                        | 0.1418                         | 0.065                       |

811 The code used for nucleic acid mutations indicates the sequence type (c = coding), the position, and the mutation type (X>Y = substitution of X  
812 by Y, insN = insertion of N, delN = deletion of N, dup = duplication). The code used for amino acid mutations indicates the sequence type (p =  
813 protein), the reference amino acid, the position, and finally the alternative amino acid, and when frame shift (fs) occurs, the position of the stop  
814 codon (X) after the mutation. For details about the nomenclature, see Ogino *et al.* (79).

815 <sup>a</sup> Data from Brazil were obtained in a previous study (13) and added for comparison.

# FIGURES

**Fig. 1 – Drug resistance evolution from standing variation or *de novo* mutation.** Drug resistance alleles spread rapidly and reach fixation with a high probability when drug resistance alleles are already present as standing variation. In contrast, if resistance alleles are absent when treatment is initiated, resistance mutation must arise *de novo*, so there is a waiting time before the resistance alleles appear, and most resistance alleles are lost by genetic drift, so the probability of establishment and fixation is low.

**Fig. 2 – Mapping of the resistance mutations on the gene sequence and structure of *Schistosoma mansoni* SmSULT-OR sulfotransferase.** Exon 1 and exon 2 are represented in orange and beige, respectively. Single nucleotide polymorphisms and insertion/deletion events are represented in cyan and magenta, respectively. (A) Linear representation of the *SmSULT-OR* gene showing the relative position of the mutations and their translation in amino acid sequences. (B) Positions of mutations on the SmSULT-OR protein. Oxamniquine is represented in yellow, 3'-phosphoadenosine-5'-phosphosulfate (PAPS) co-factor is represented in green.

**Fig. 3 – Enzymatic activity of recombinant *Schistosoma mansoni* SmSULT-OR sulfotransferase expressed from different allelic variants.** This *in vitro* oxamniquine activation assay quantifies DNA-oxamniquine complexes by scintillation (counts per minute). Bars show the mean of three replicates, while error bars are S.E.M. Enzyme carrying known loss-of-function mutations, such as p.C35R or p.E142del, as well as a newly identified variant (p.L179P) showed no or low oxamniquine activation, while two newly identified variants (p.S160L and p.P225S) showed intermediate activation. The newly identified p.P106S did not impair oxamniquine activation. The different letters indicate significant differences in oxamniquine activation means (Tukey's HSD,  $p < 0.05$ ).

**Fig. 4 – *In silico* evaluation of mutations on protein stability.** We computed the difference in free enthalpy ( $\Delta\Delta G$ ) between the mutated and the wild type proteins. The higher the  $\Delta\Delta G$ , the more unstable is the mutated protein. Only single amino acid changes within the resolved crystal structure were examined. For completeness, we included mutations from our current dataset and from previous studies (10,13). Grey bars correspond to known sensitive alleles. Red bars correspond to validated resistant alleles. Grey labels correspond to mutations identified previously from South America (13).

**Fig. 5 – World map showing proportion of resistance and sensitive alleles in South America (Brazil), West Africa (Senegal and Niger), East Africa (Tanzania) and Middle East (Oman).** Number of homozygous (hmz) and heterozygous (htz) parasites for resistant alleles, and total number of parasites sampled (n) are shown below the pie charts. East Africa showed the highest frequency of resistant alleles and resistant parasites. Data from Brazil from a previous study (13) was added for comparison.

856

857 **Fig. 6 – Common origin of the p.E142del mutation in the Old and New World.** (A) Haplotype  
858 variation in all the samples bearing p.E142del from Caribbean (HR9), Niger (NE) and Tanzania  
859 (TZ) across a 102.5 kb region of chr. 6. Each row represents a chromosome, HR9 was used as  
860 reference, blank squares reflect HR9 allele state, and black squares correspond to the  
861 alternative allele. Relative bp position to p.E142del (0 bp) is shown on the x-axis. The first and  
862 last variants showed on the block correspond to the break of the haplotype block. The  
863 Caribbean sample (HR9) and a Nigerien sample (Sm.NE\_Di158.1) share an identical haplotype  
864 block of 102.5 kb. (B) Minimum spanning network of 410 haplotypes of the 102.5 kb region  
865 previously identified. The network was built using 399 bi-allelic variants. Node size is  
866 proportional to sample size (smallest node: n=1; biggest node n=50). Nodes with samples  
867 carrying p.E142del are circled in blue. Caribbean and West African haplotypes carrying  
868 p.E142del clustered together indicating a common origin. The p.E142del from East Africa has  
869 different flanking haplotypes.

870

871 **Fig. 7 – Impact of starting allele frequency on OXA-R allele change.** (A) Monte Carlo simulation  
872 over 1,500 generations using strong selection (selection coefficient ( $s$ ) = 0.1) on a population  
873 size ( $N$ ) of 65,000 with a starting allele frequency ( $p(R)$ ) of 0.15 for standing variation or  $1/(2N)$   
874 for new mutation. These simulations underestimate time to fixation for true *de novo* mutation,  
875 because we do not account for the waiting time for resistance to appear which is dependant on  
876 the rate of drug resistance mutations and  $N_e$  (3). The starting frequency of 0.15 corresponds to  
877 the frequencies of OXA-resistance alleles observed in Kenya. (B) Change in frequency of  
878 resistant parasites (i.e. homozygotes for OXA-R alleles) from standing variation under a range of  
879 selection coefficients. The dashed line corresponds to the two thresholds (10% and 20%) at  
880 which treatment efficacy would be compromised. The numbers at the dashedlines correspond  
881 to the parasite generations needed to cross these thresholds. These predictions are  
882 deterministic, because we expect minimal stochastic variation when starting resistance allele  
883 frequencies are high.

884 **SUPPLEMENTARY TABLES**

885

886 **Supp. table 1 – Mutations scored in samples from West Africa (Senegal and Niger), East Africa**  
887 **(Tanzania) and Middle East (Oman).**

888

889 **Supp. table 2 – Sampling information for the schistosome material used.**

OXA activation (count per minute)

bioRxiv preprint doi: <https://doi.org/10.1101/657056>; this version posted May 24, 2019. The copyright holder for this preprint (which was not certified by peer review) is the author/funder, who has granted bioRxiv a license to display the preprint in perpetuity. It is made available under aCC-BY 4.0 International license.

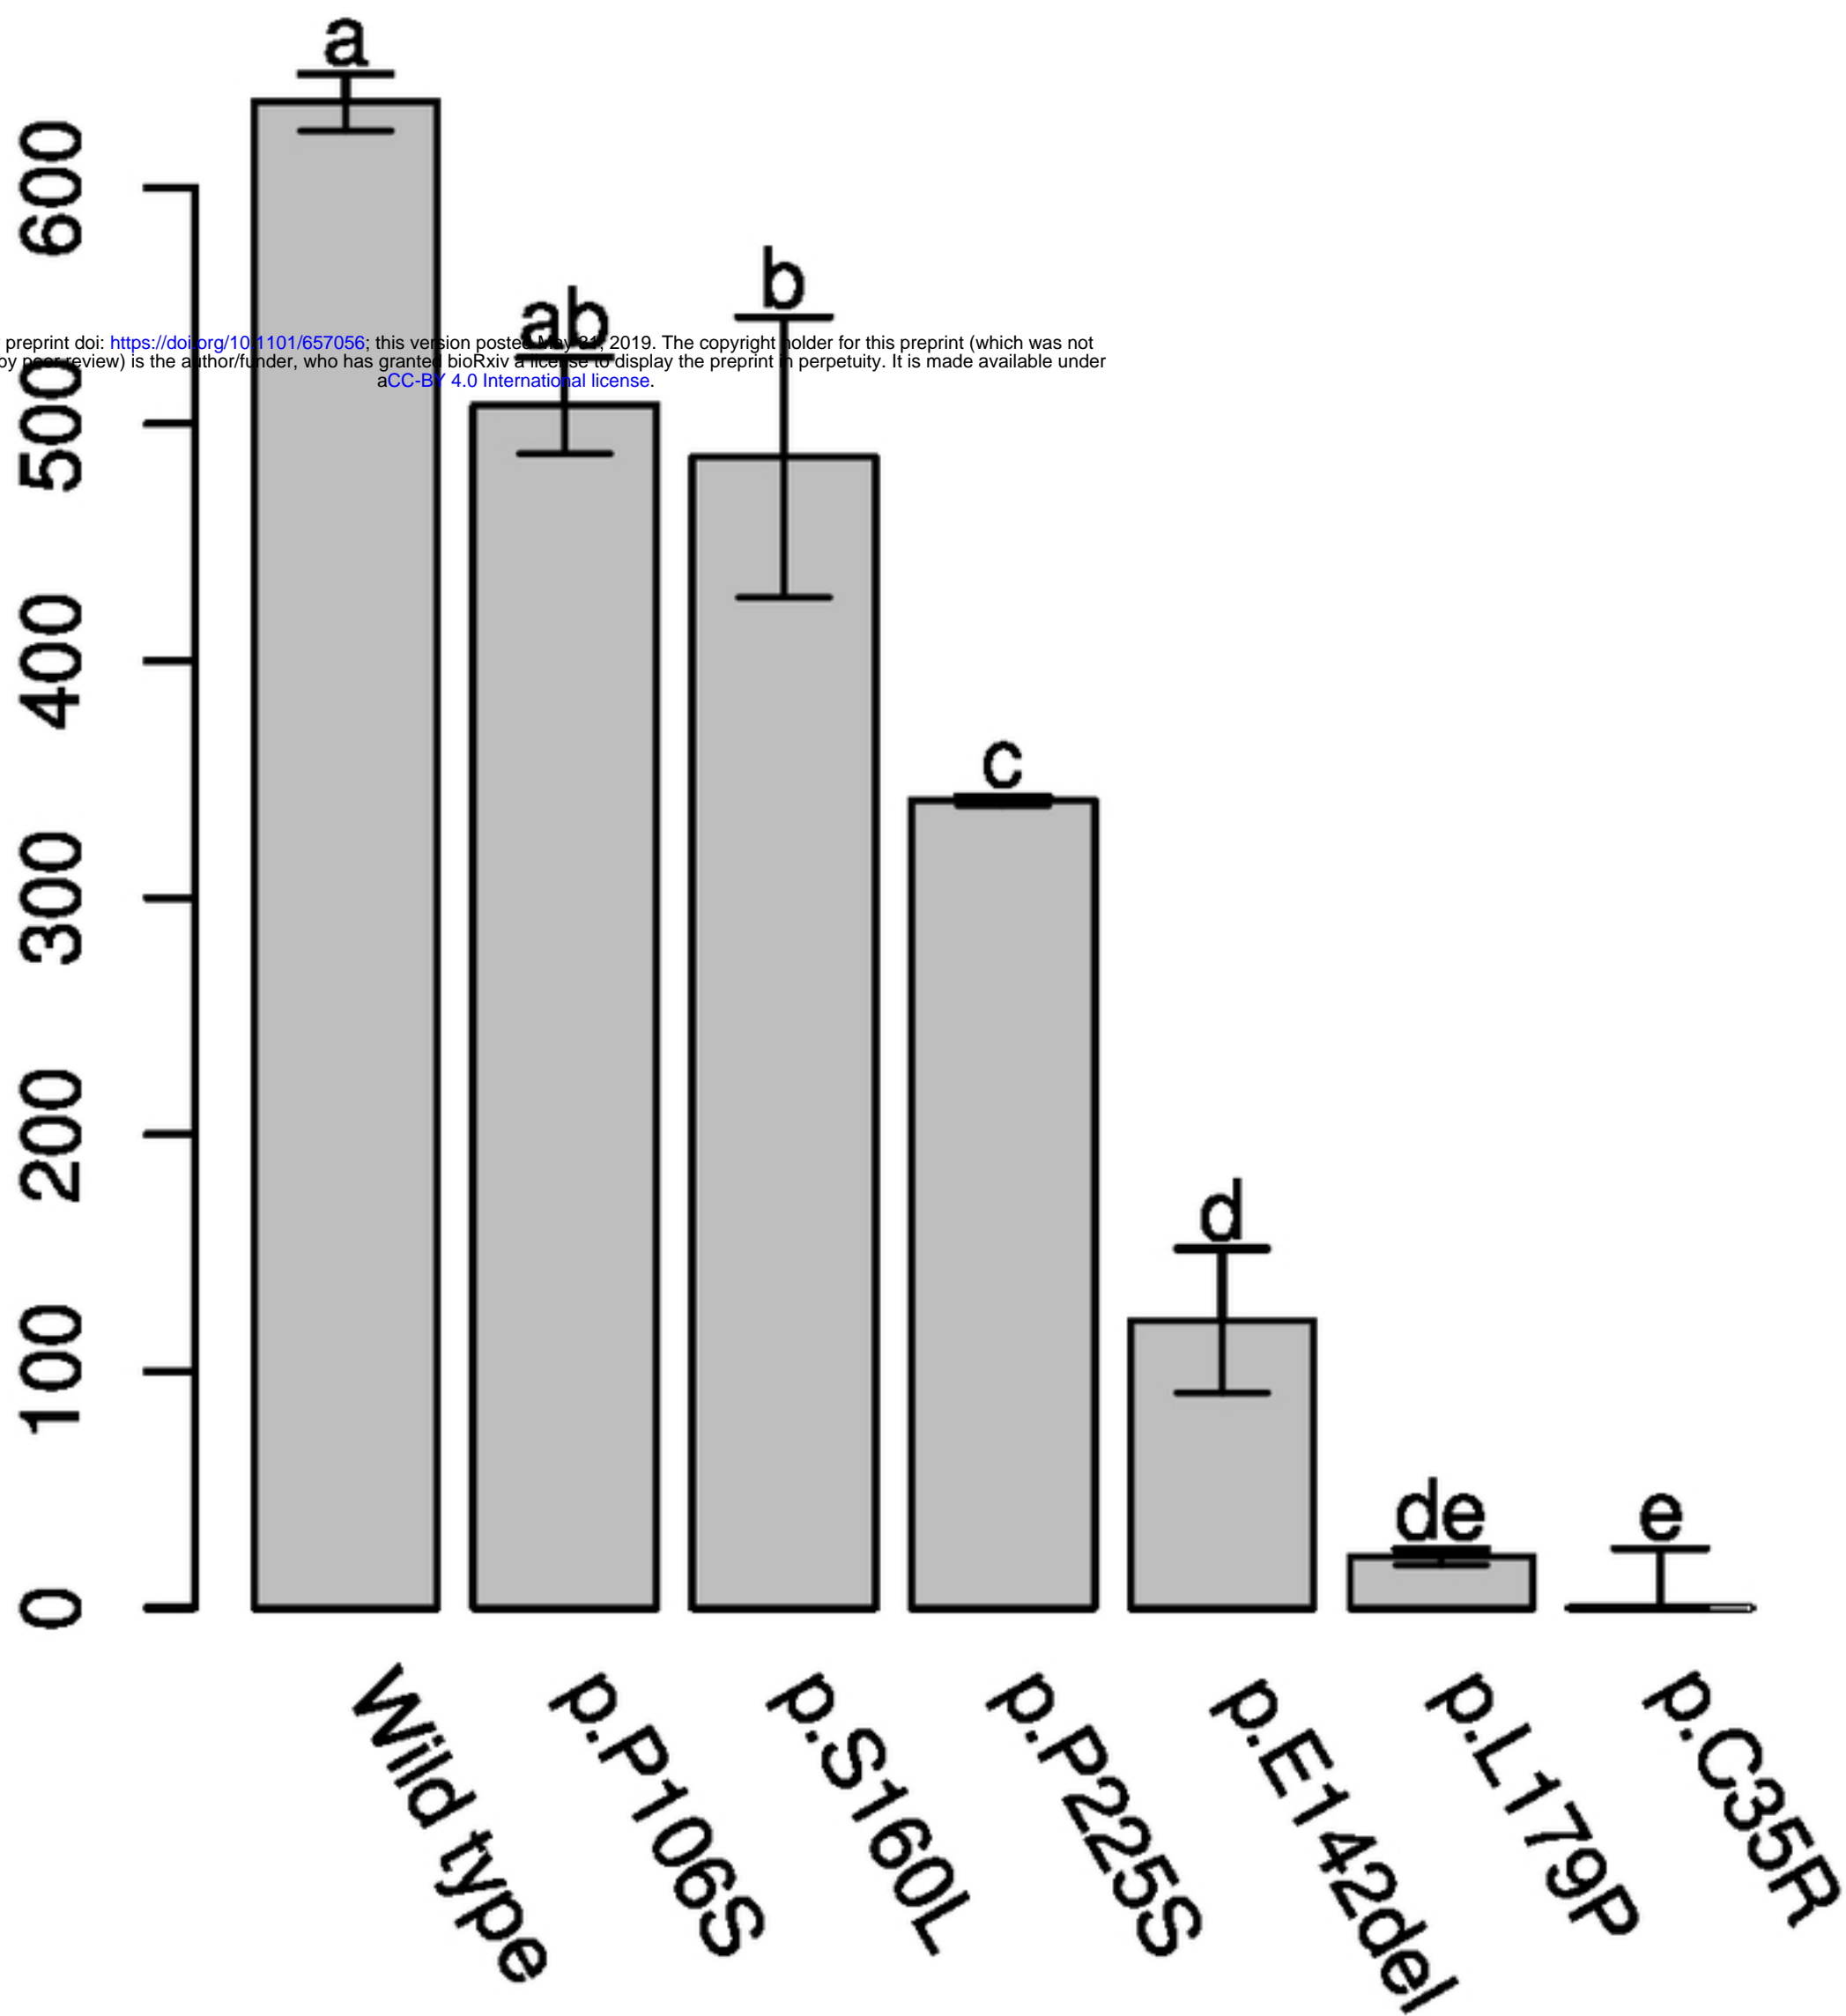

Figure 3

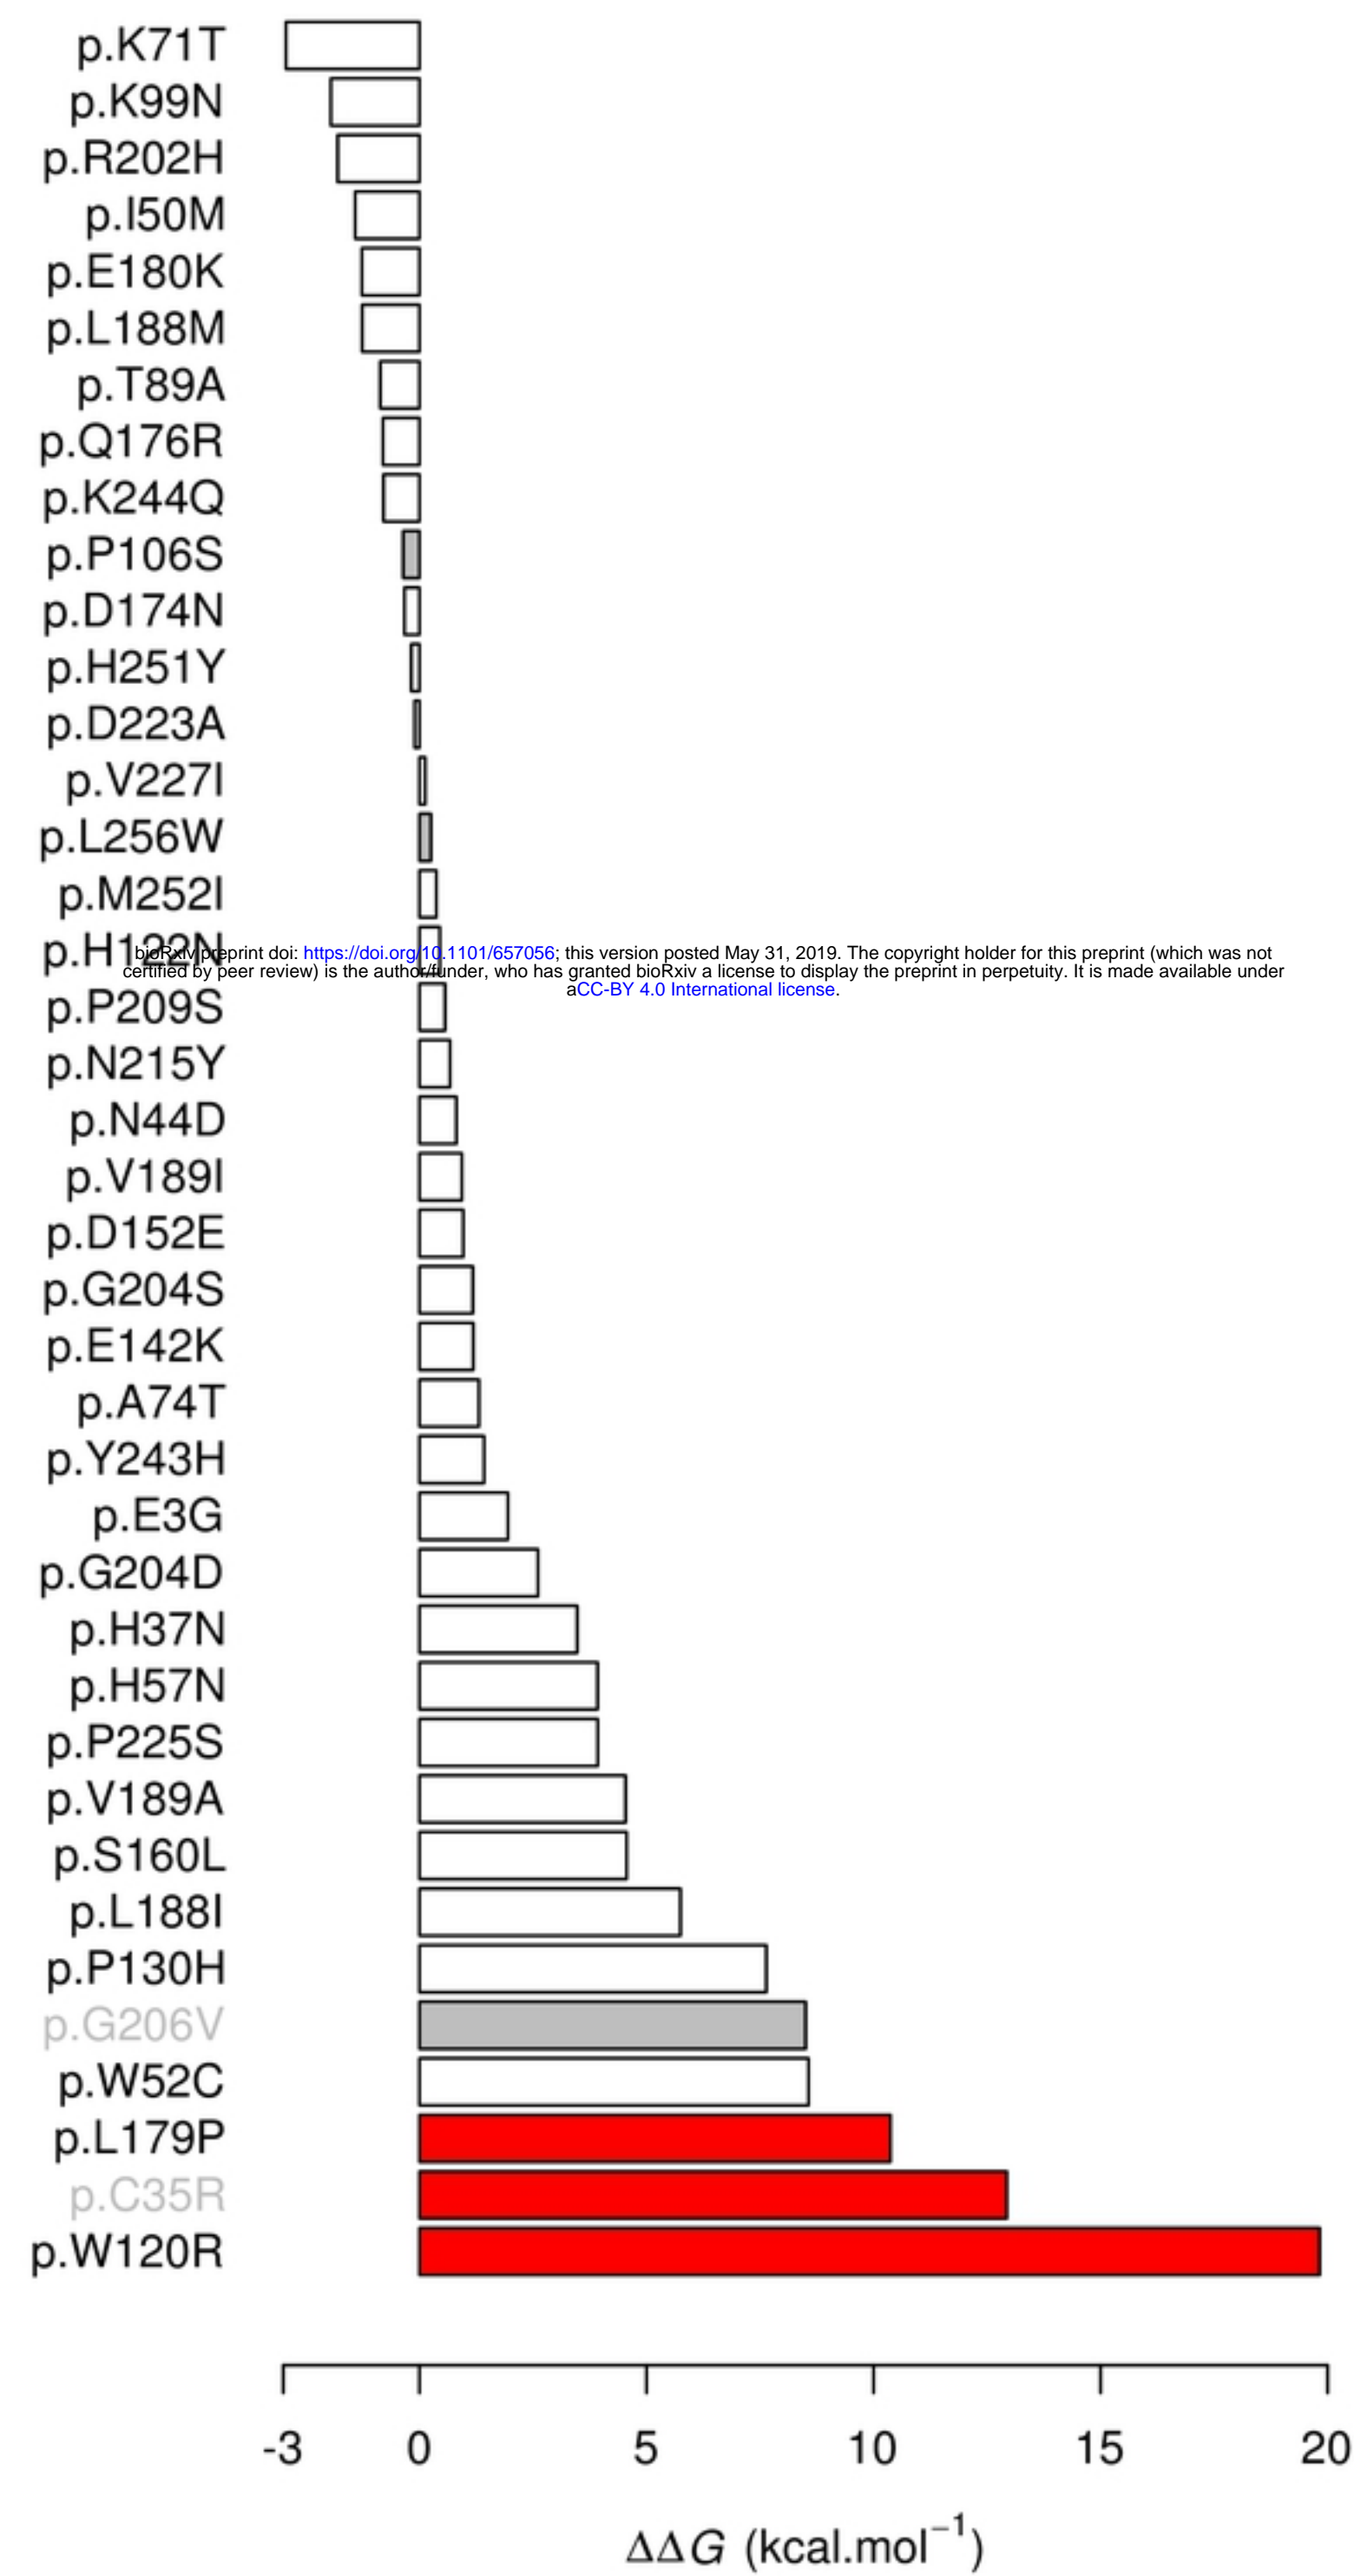

Figure 4

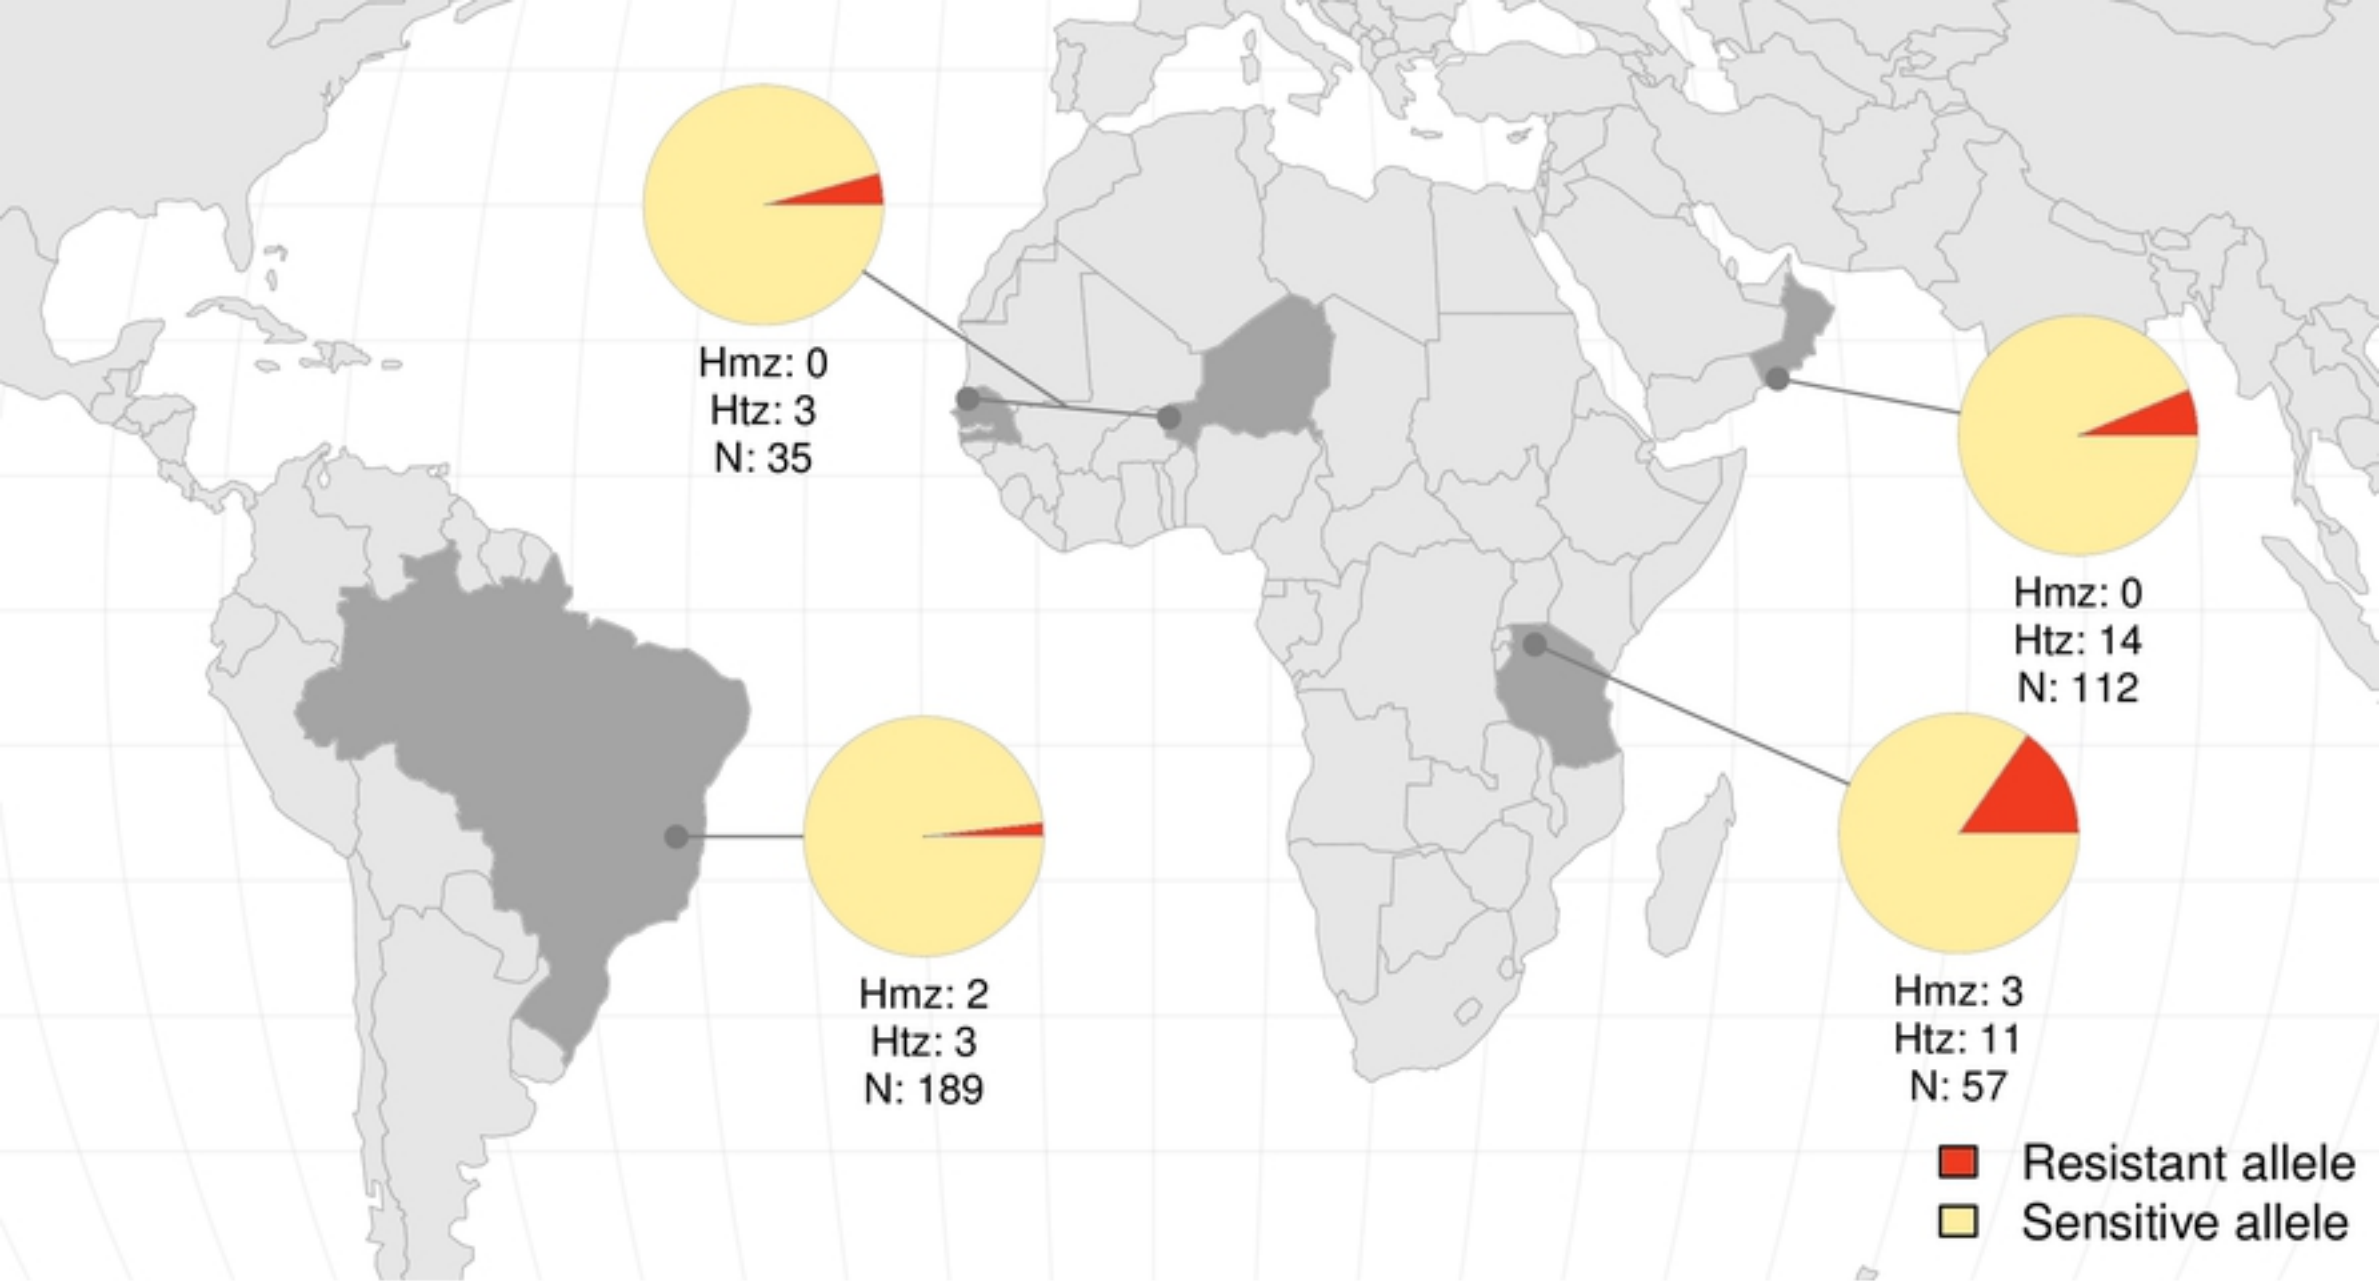

Figure 5

A

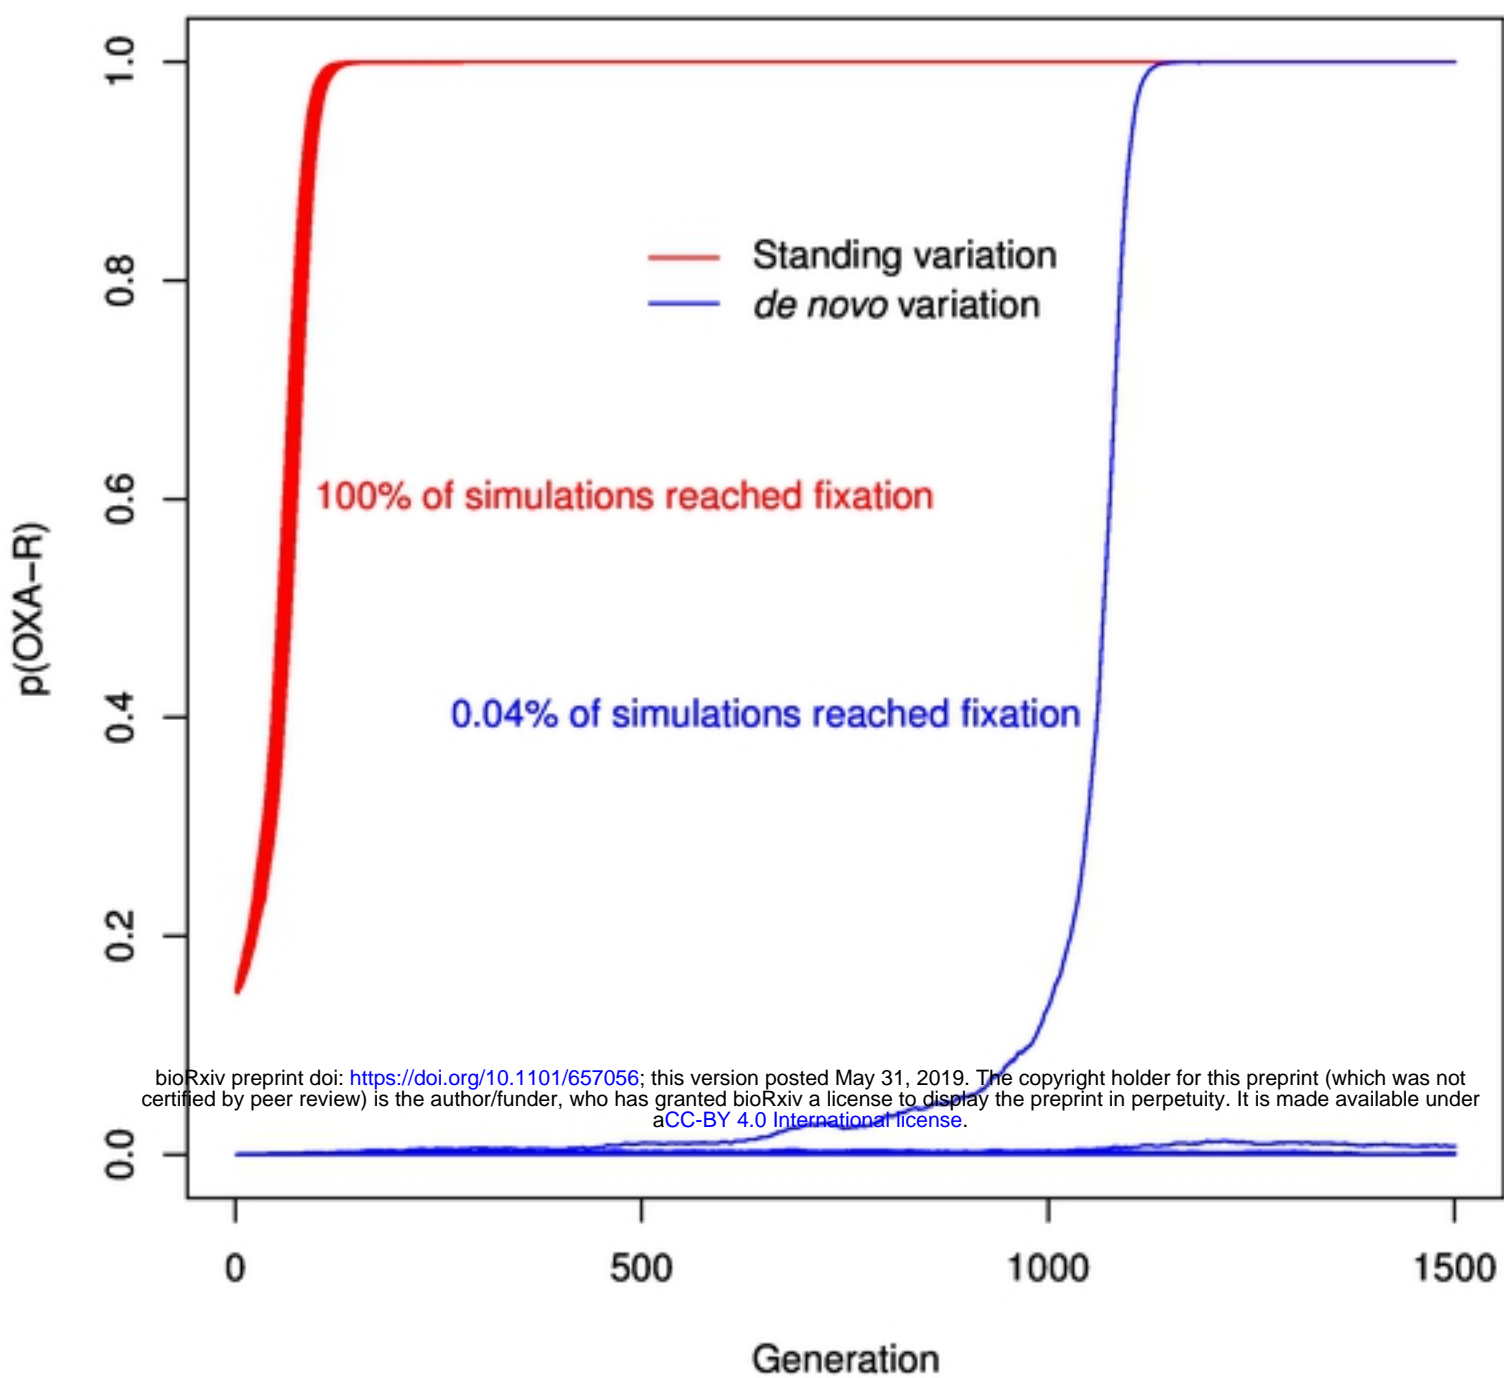

B

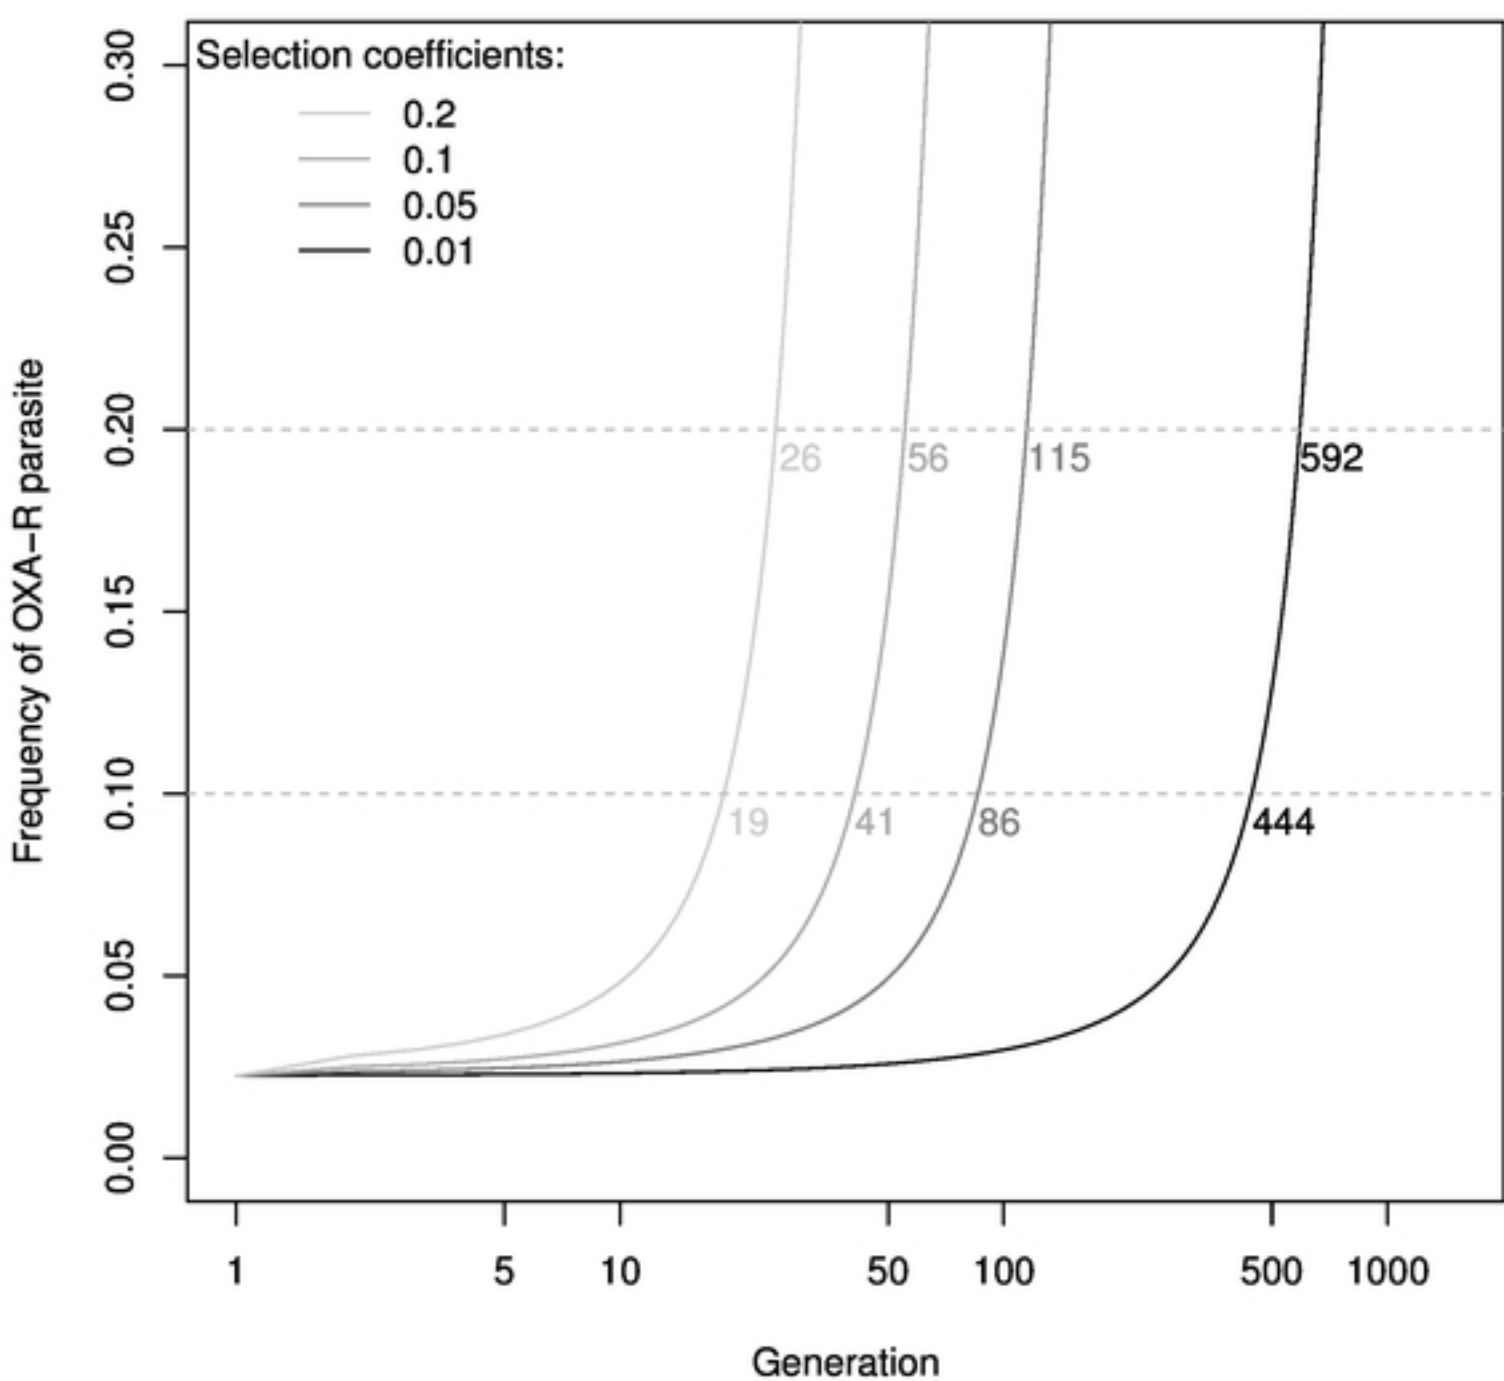

Figure 7



## Standing variation

Mutation **present** before selection

Starting allele frequency =  $p$ (resistant allele)

→ **No** waiting time

Drug resistance evolves rapidly

High probability of fixation

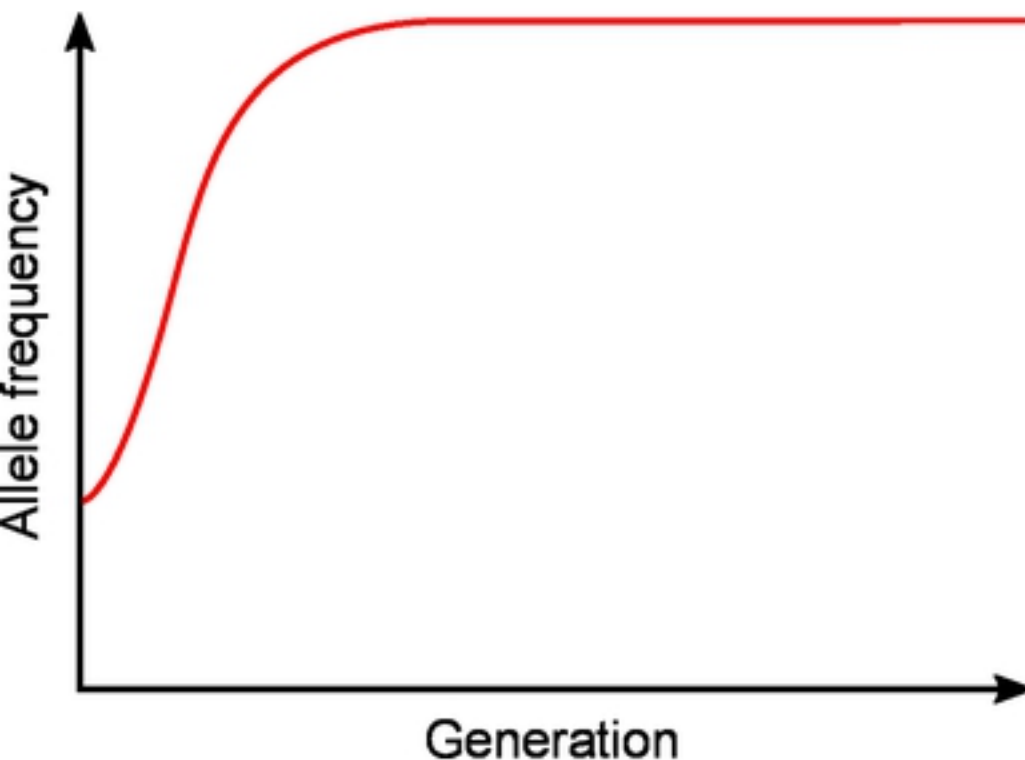

## De novo variation

Mutation **must appear** before selection

Starting allele frequency =  $1/(2N_e)$

→ Waiting time

Drug resistance evolves slowly

Low probability of fixation

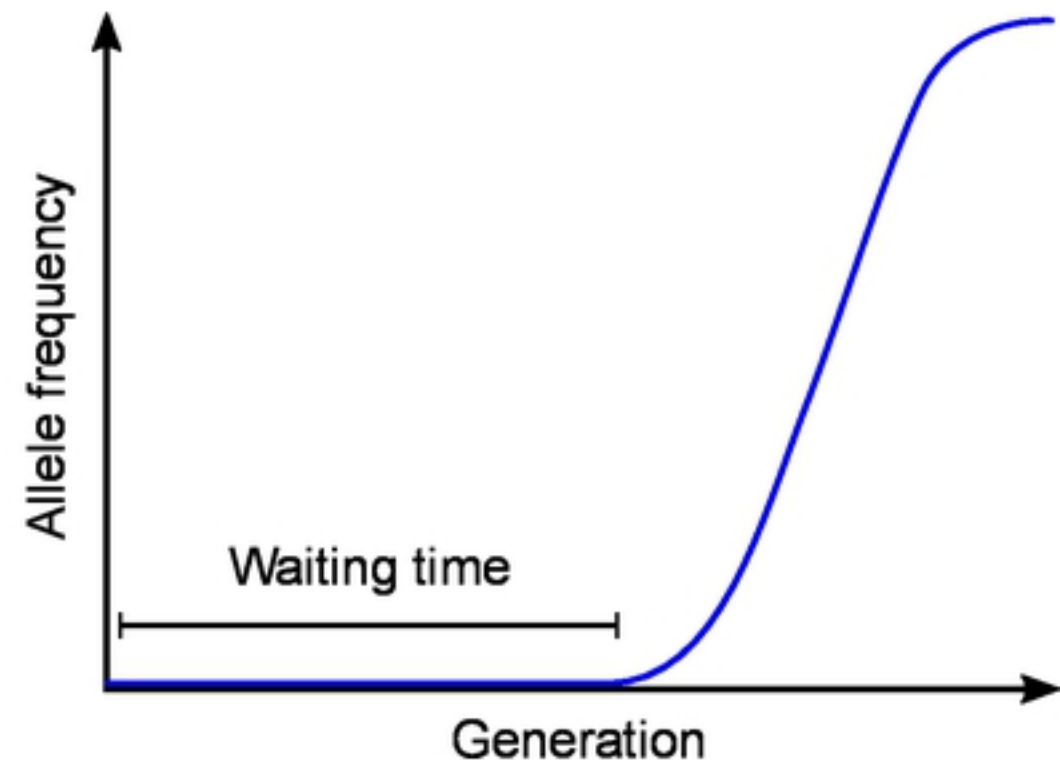

Figure 1

A

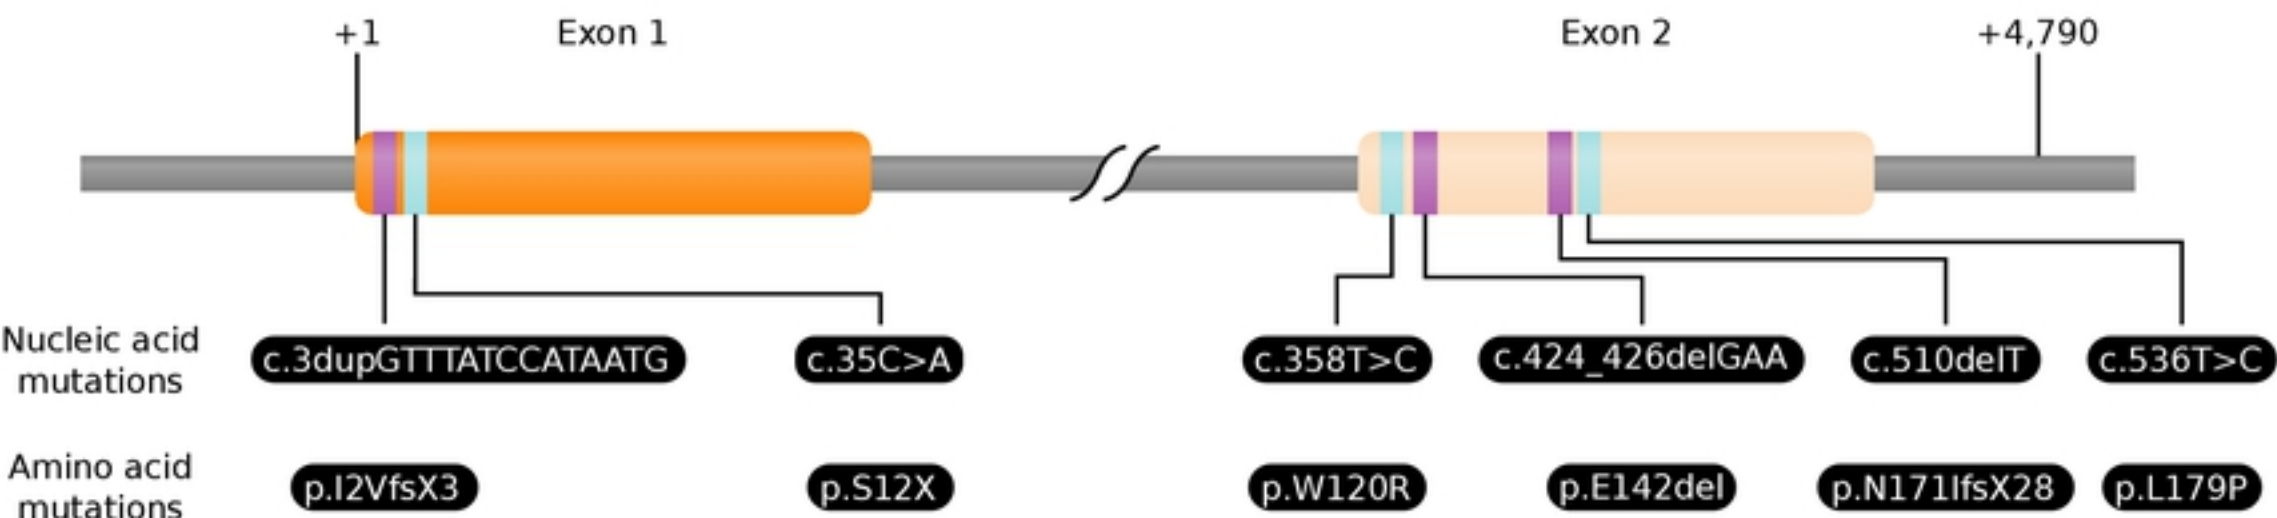

B

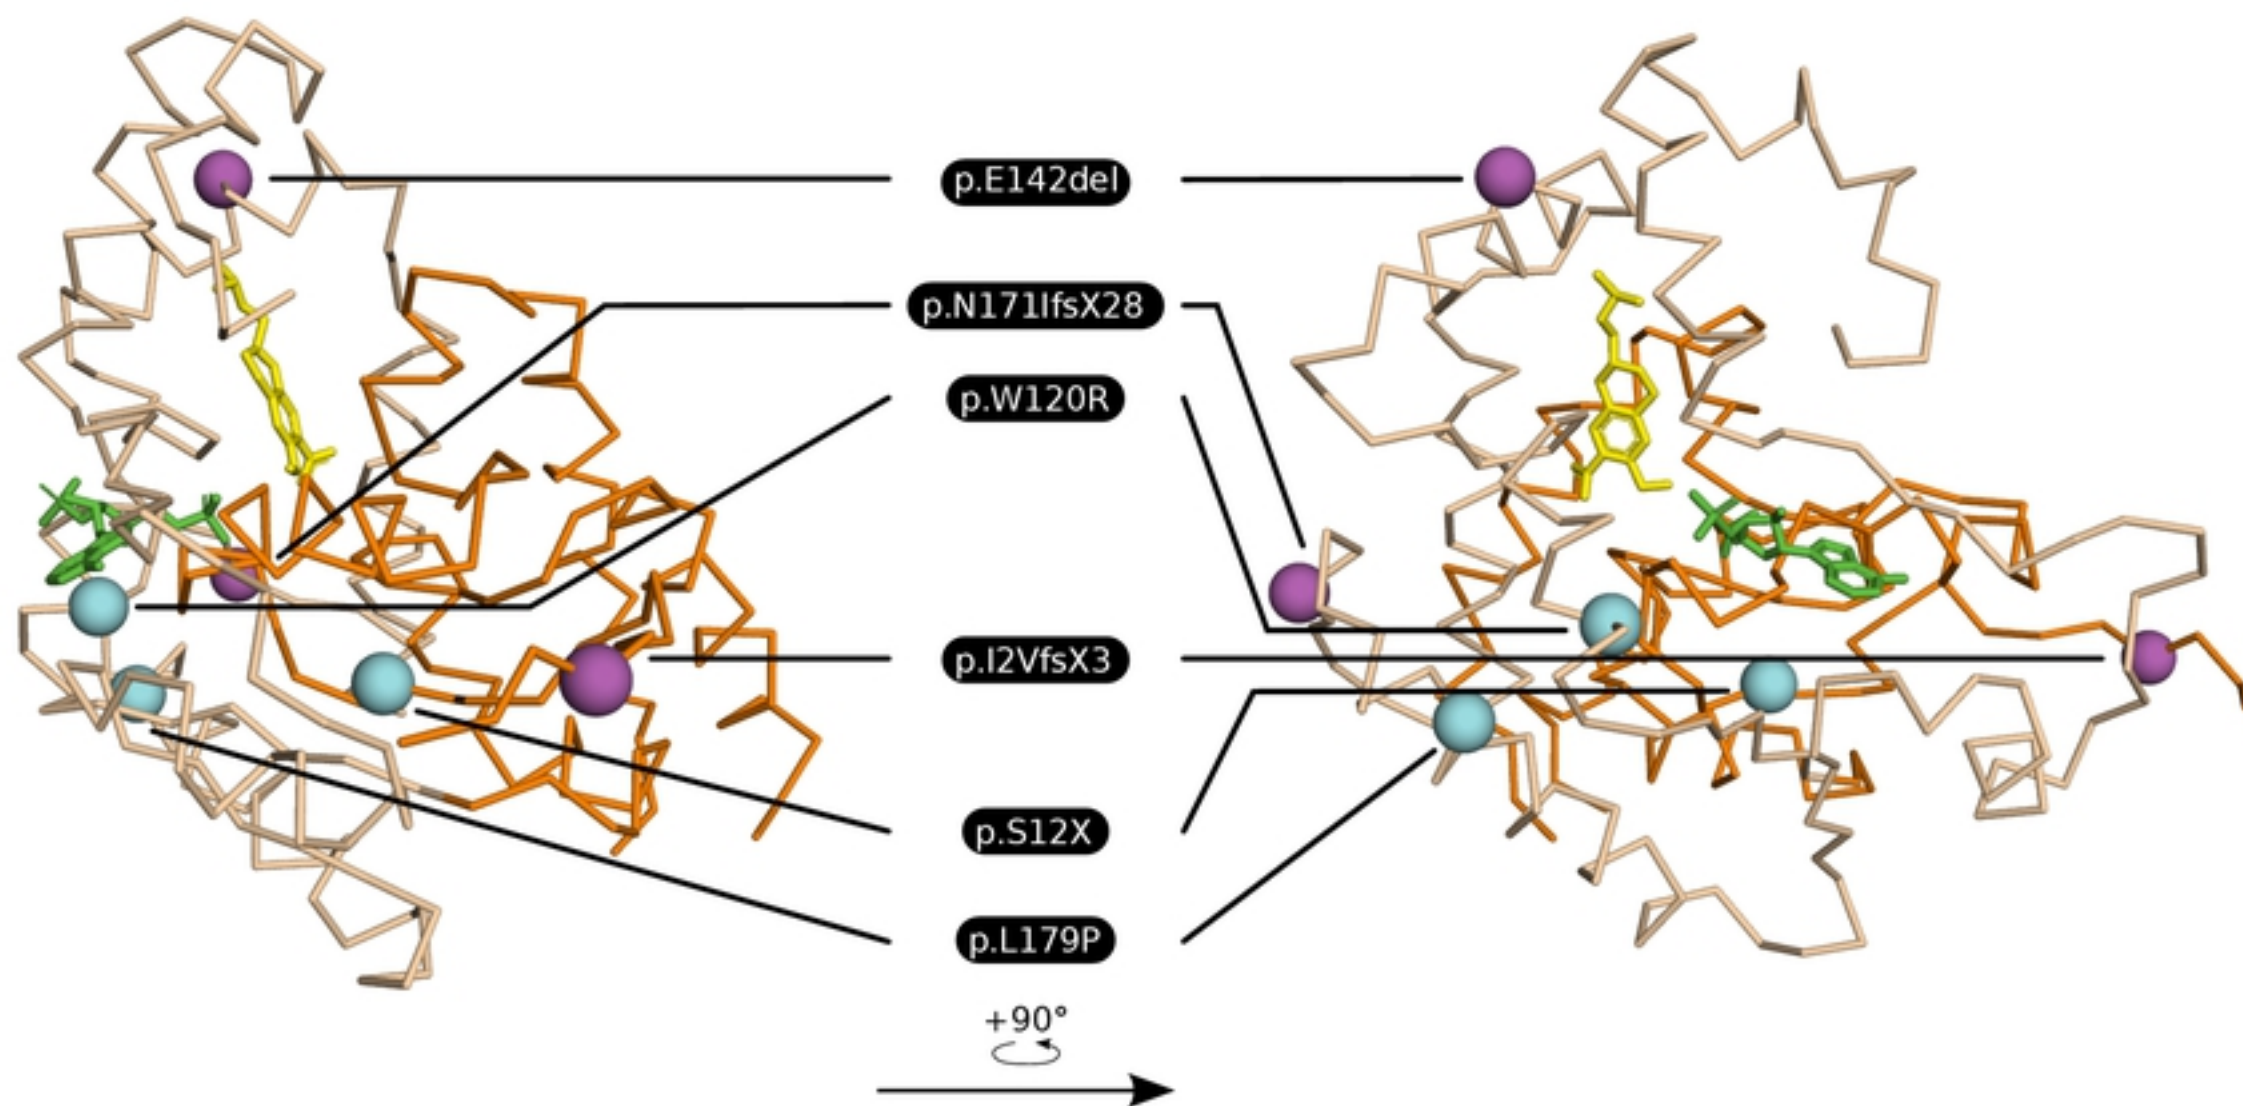

Figure 2

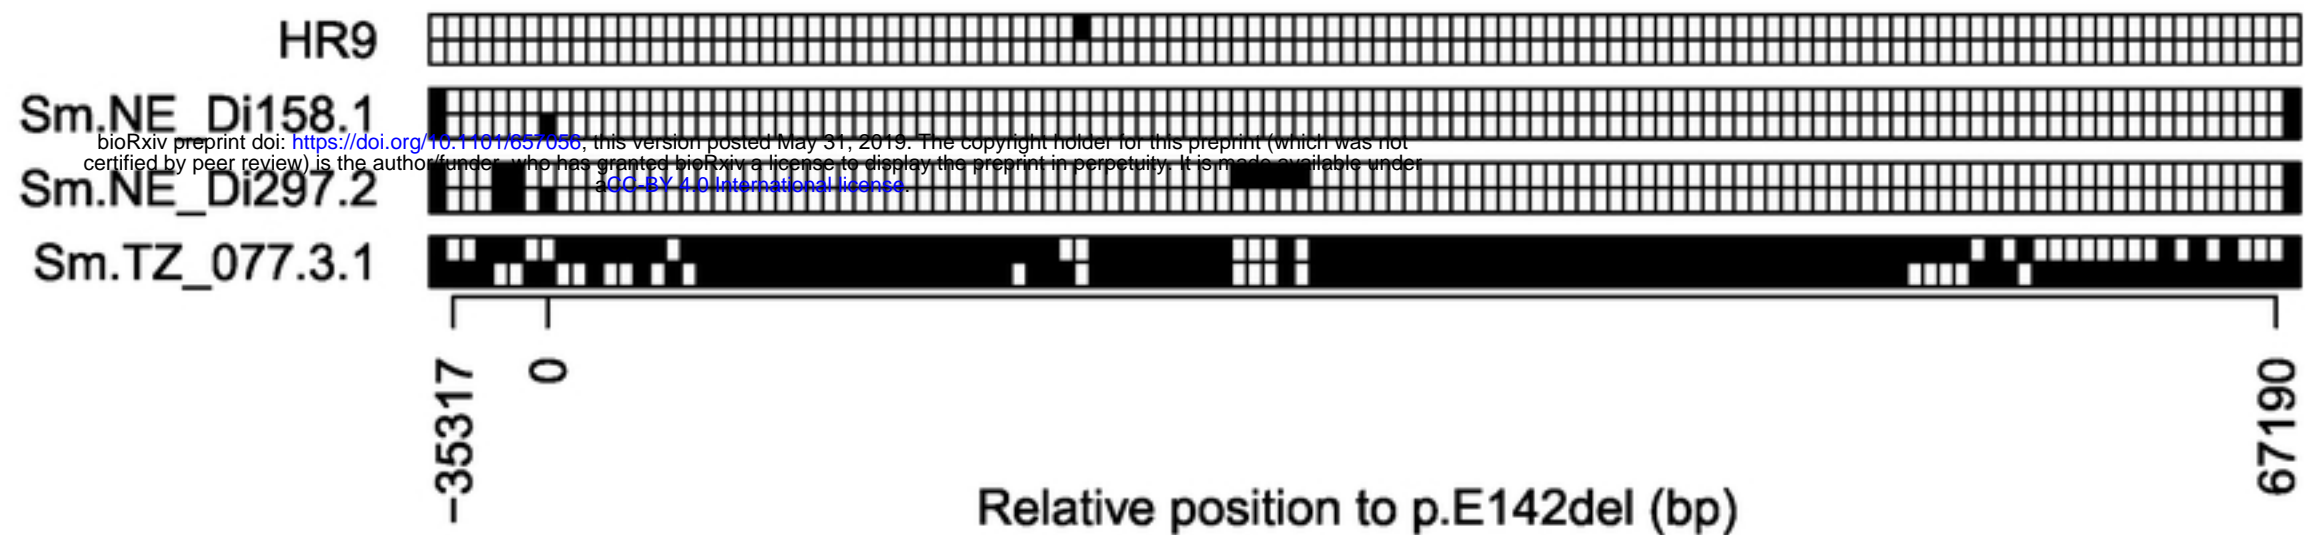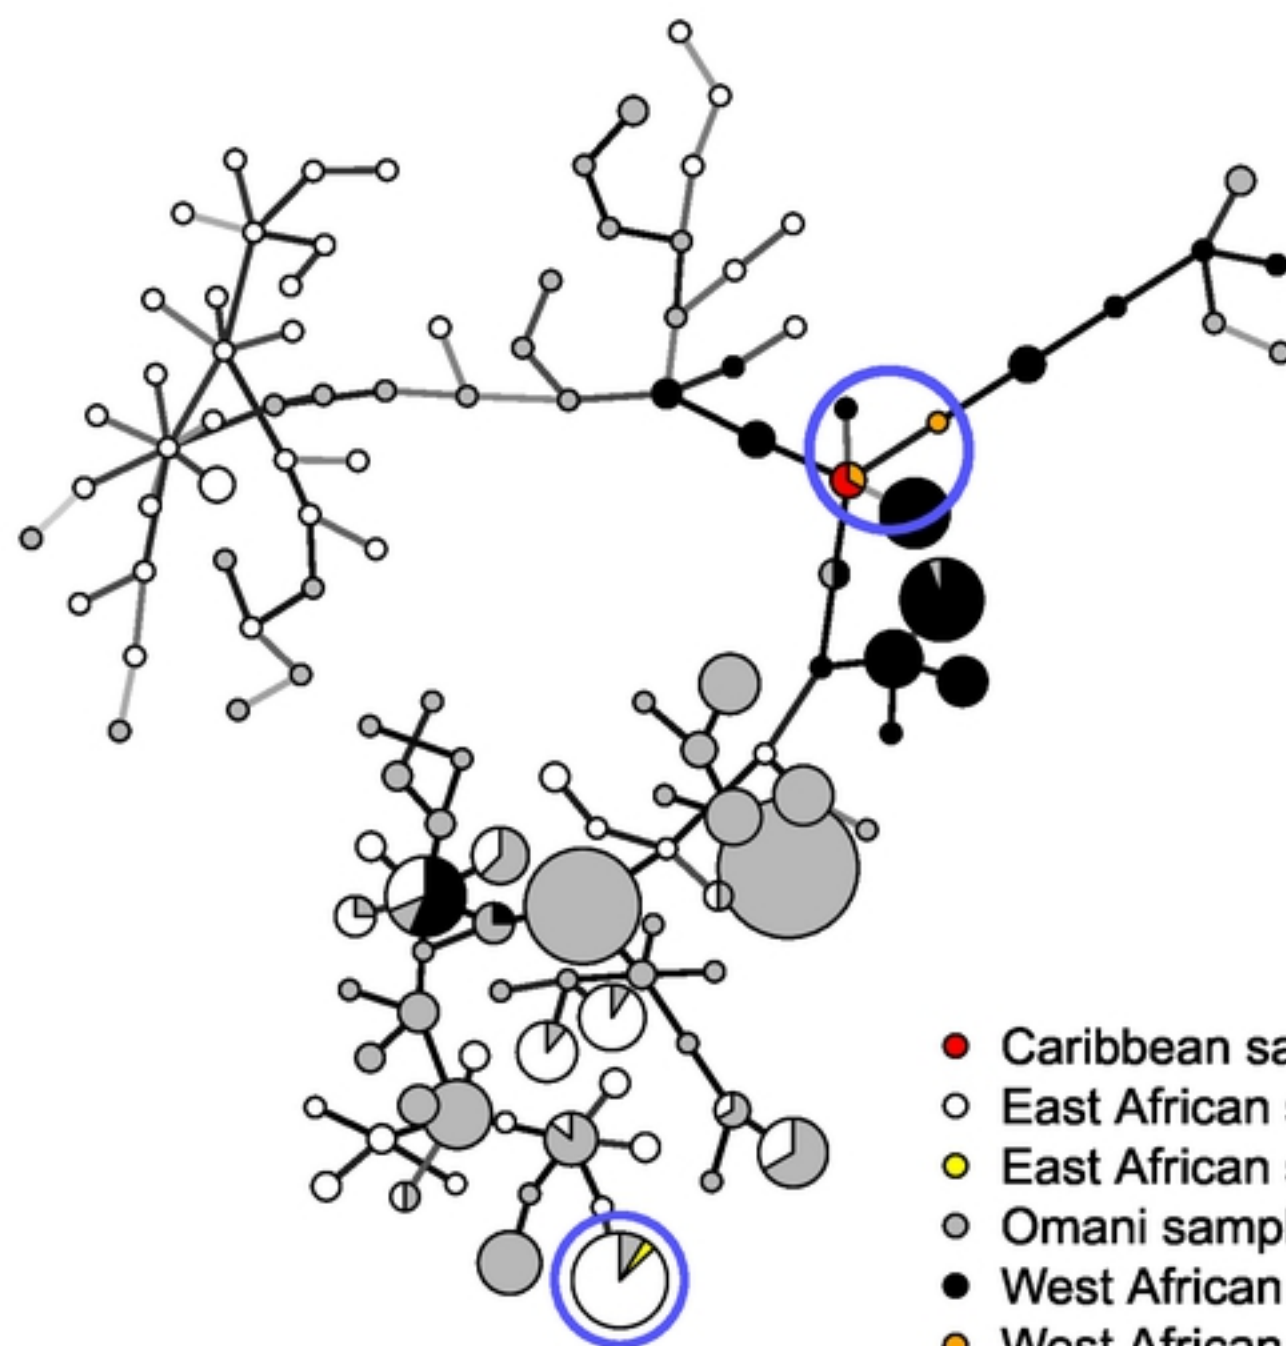

- Caribbean sample with p.E142del
- East African samples
- East African samples with p.E142del
- Omani samples
- West African samples
- West African samples with p.E142del

Figure 6
